# Supplementary material for: Miniolins A–C, novel isomeric furanones induced by epigenetic manipulation of Penicillium minioluteum
Source: Royal Society of Chemistry journal article supplement (doi:10.1039/c4ra11712c), 2014-11-19

## Supplementary Information

### Miniolins A–C, Novel Isomeric Furanones Induced by Epigenetic

#### Manipulation on *Penicillium minioluteum*

Hao-Yu Tang,<sup>‡</sup> Qiang Zhang,<sup>‡</sup> Yu-Qi Gao, An-Ling Zhang, and Jin-Min Gao\*

<sup>‡</sup> H.-Y. Tang and Q. Zhang contributed equally

\* Corresponding Author, [jinminggao@nwsuaf.edu.cn](mailto:jinminggao@nwsuaf.edu.cn)

## CONTENTS

|                                                                                                                                                         |    |
|---------------------------------------------------------------------------------------------------------------------------------------------------------|----|
| Figure S1. HPLC profiles of culture extracts from <i>P. minioluteum</i> cultivated in PD media (upper) and PD media with 500 $\mu$ M Aza (bottom) ..... | 1  |
| Figure S2. LC/MS <sup>2</sup> analysis of oxidation products of compounds 1-3 .....                                                                     | 2  |
| (1) HPLC Profile of oxidation products from compounds 1-3 on an Agilent TC-18 column .....                                                              | 2  |
| (2) Full MS and MS/MS of peak 1 from negative ESI source .....                                                                                          | 2  |
| (3) Proposed MS/MS fragmentation pathway of the methylsuccinic acid .....                                                                               | 2  |
| Figure S3. <sup>1</sup> H NMR of 1 in CDCl <sub>3</sub> (500 MHz) .....                                                                                 | 3  |
| Figure S4. <sup>13</sup> C NMR and DEPT of 1 in CDCl <sub>3</sub> (125 MHz) .....                                                                       | 4  |
| Figure S5. HSQC spectrum of 1 .....                                                                                                                     | 5  |
| Figure S6. <sup>1</sup> H- <sup>1</sup> H COSY spectrum of 1 .....                                                                                      | 6  |
| Figure S7. HMBC spectrum of 1 .....                                                                                                                     | 7  |
| Figure S8. NOESY spectrum of 1 .....                                                                                                                    | 10 |
| Figure S9. Positive ESIMS spectrum of 1 .....                                                                                                           | 11 |
| Figure S10. HR ESIMS spectrum of 1 .....                                                                                                                | 12 |
| Figure S11. IR spectrum of 1 .....                                                                                                                      | 13 |
| Figure S12. UV and CD spectra of 1 .....                                                                                                                | 14 |
| Figure S13. <sup>1</sup> H NMR spectrum of 2 in CDCl <sub>3</sub> (500 MHz) .....                                                                       | 15 |
| Figure S14. <sup>13</sup> C NMR and DEPT of 2 in CDCl <sub>3</sub> (125 MHz) .....                                                                      | 16 |

|             |                                                                              |    |
|-------------|------------------------------------------------------------------------------|----|
| Figure S15. | HSQC spectrum of 2.....                                                      | 17 |
| Figure S16. | $^1\text{H}$ - $^1\text{H}$ COSY spectrum of 2.....                          | 18 |
| Figure S17. | HMBC spectrum of 2.....                                                      | 19 |
| Figure S18. | NOESY spectrum of 2.....                                                     | 22 |
| Figure S19. | Positive ESIMS spectrum of 2.....                                            | 23 |
| Figure S20. | HR ESIMS spectrum of 2.....                                                  | 24 |
| Figure S21. | IR spectrum of 2.....                                                        | 25 |
| Figure S22. | UV and CD spectra of 2.....                                                  | 26 |
| Figure S23. | $^1\text{H}$ NMR spectrum of 3 in $\text{CDCl}_3$ (500 MHz).....             | 27 |
| Figure S24. | $^{13}\text{C}$ NMR and DEPT spectrum of 3 in $\text{CDCl}_3$ (125 MHz)..... | 28 |
| Figure S25. | HSQC spectrum of 3.....                                                      | 29 |
| Figure S26. | $^1\text{H}$ - $^1\text{H}$ COSY spectrum of 3.....                          | 30 |
| Figure S27. | HMBC spectrum of 3.....                                                      | 31 |
| Figure S28. | NOESY spectrum of 3.....                                                     | 34 |
| Figure S29. | Positive ESIMS spectrum of 3.....                                            | 35 |
| Figure S30. | HR ESIMS spectrum of 3.....                                                  | 36 |
| Figure S31. | IR spectrum of 3.....                                                        | 37 |
| Figure S32. | UV and CD spectra of 3.....                                                  | 38 |
| Figure S33. | $^1\text{H}$ NMR spectrum of 4 in $\text{CDCl}_3$ (400 MHz).....             | 39 |
| Figure S34. | $^{13}\text{C}$ NMR spectrum of 4 in $\text{CDCl}_3$ (100 MHz).....          | 40 |
| Figure S35. | IR spectrum of 4.....                                                        | 41 |
| Figure S36. | UV spectrum of 4.....                                                        | 42 |
| Figure S37. | ESIMS of 4.....                                                              | 43 |
| Figure S38. | CD of 4.....                                                                 | 44 |

**Figure S1. HPLC profiles of culture extracts from *P. minioluteum* cultivated in PD media (upper) and PD media with 500  $\mu$ M Aza (bottom)**

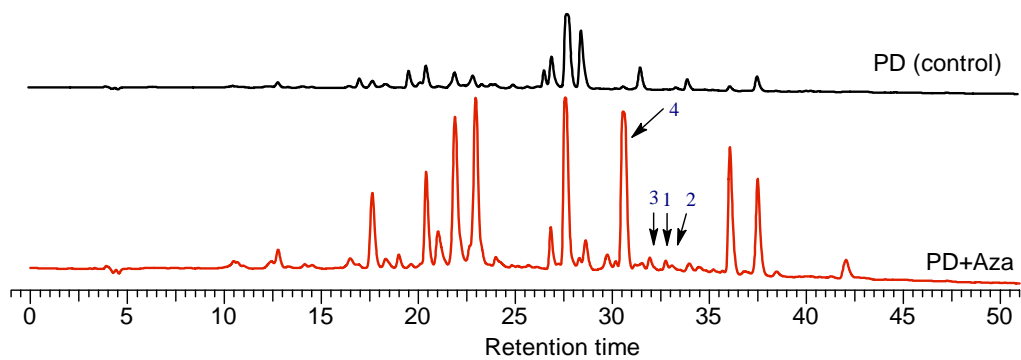

## Figure S2.LC/MS<sup>2</sup> analysis of oxidation products of compounds 1-3

### (1) HPLC Profile of oxidation products from compounds 1-3 on an Agilent TC-18 column

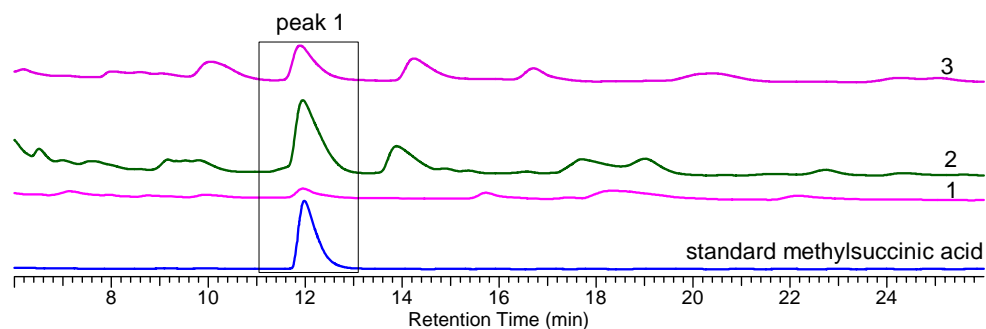

Column: Agilent TC-18 column 250×4.6 mm; Elution solvent: 10% MeOH/H<sub>2</sub>O with 0.1% TFA; Temperature: 25 °C; Detector: UV @210nm

### (2) Full MS and MS/MS of peak 1 from negative ESI source

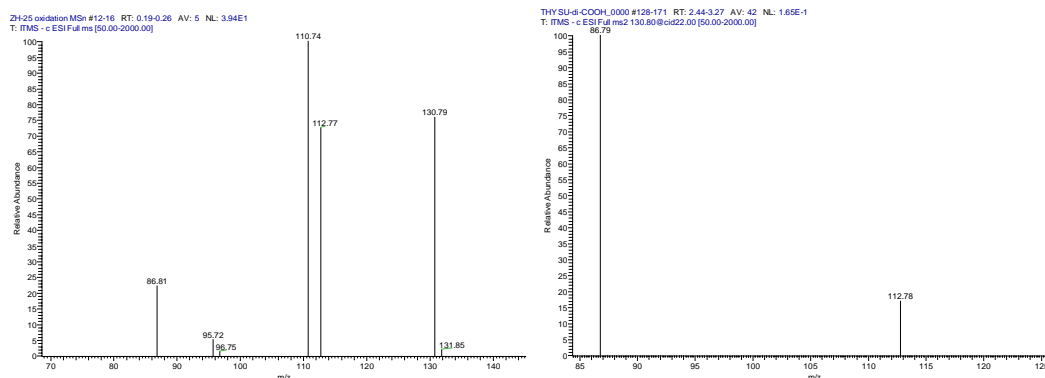

### (3) Proposed MS/MS fragmentation pathway of the methylsuccinic acid

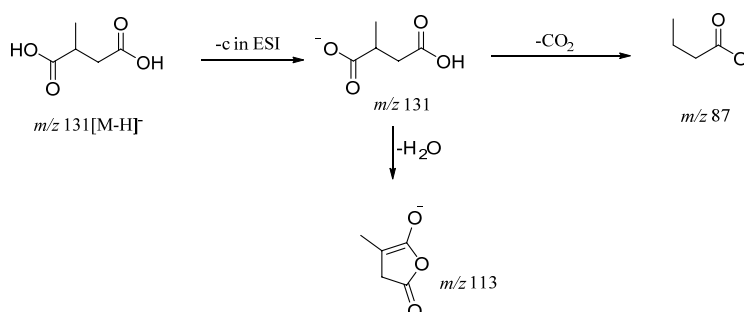

Figure S3.  $^1\text{H}$  NMR of **1** in  $\text{CDCl}_3$  (500 MHz)

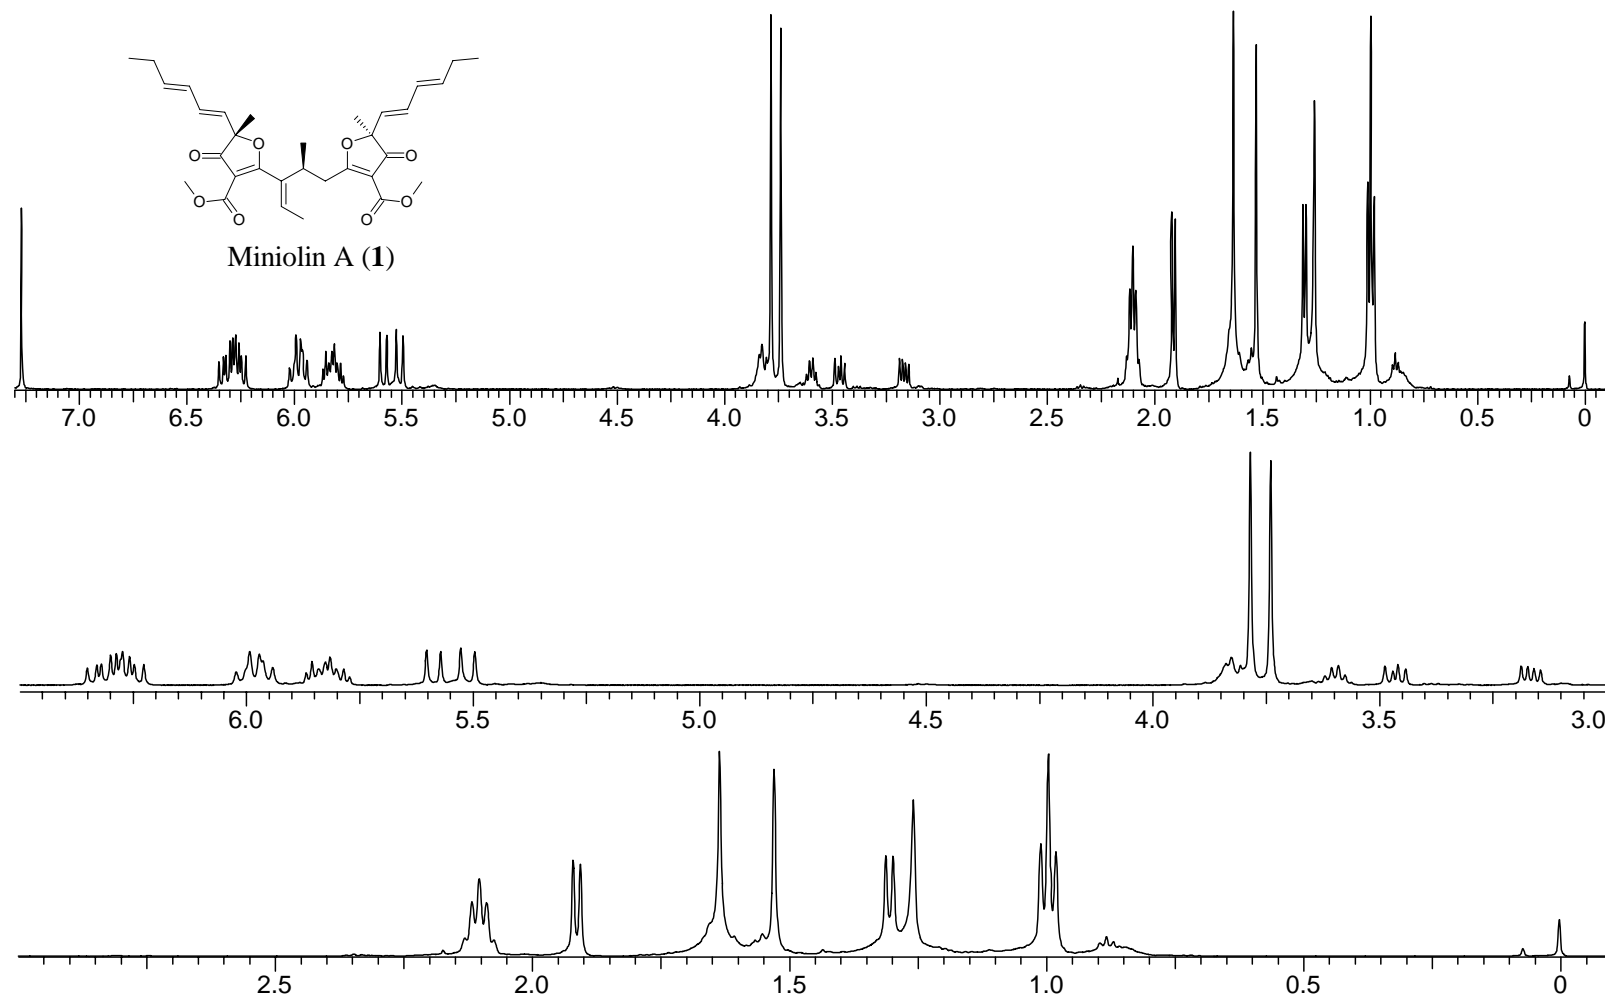

Figure S4.  $^{13}\text{C}$  NMR and DEPT of **1** in  $\text{CDCl}_3$  (125 MHz)

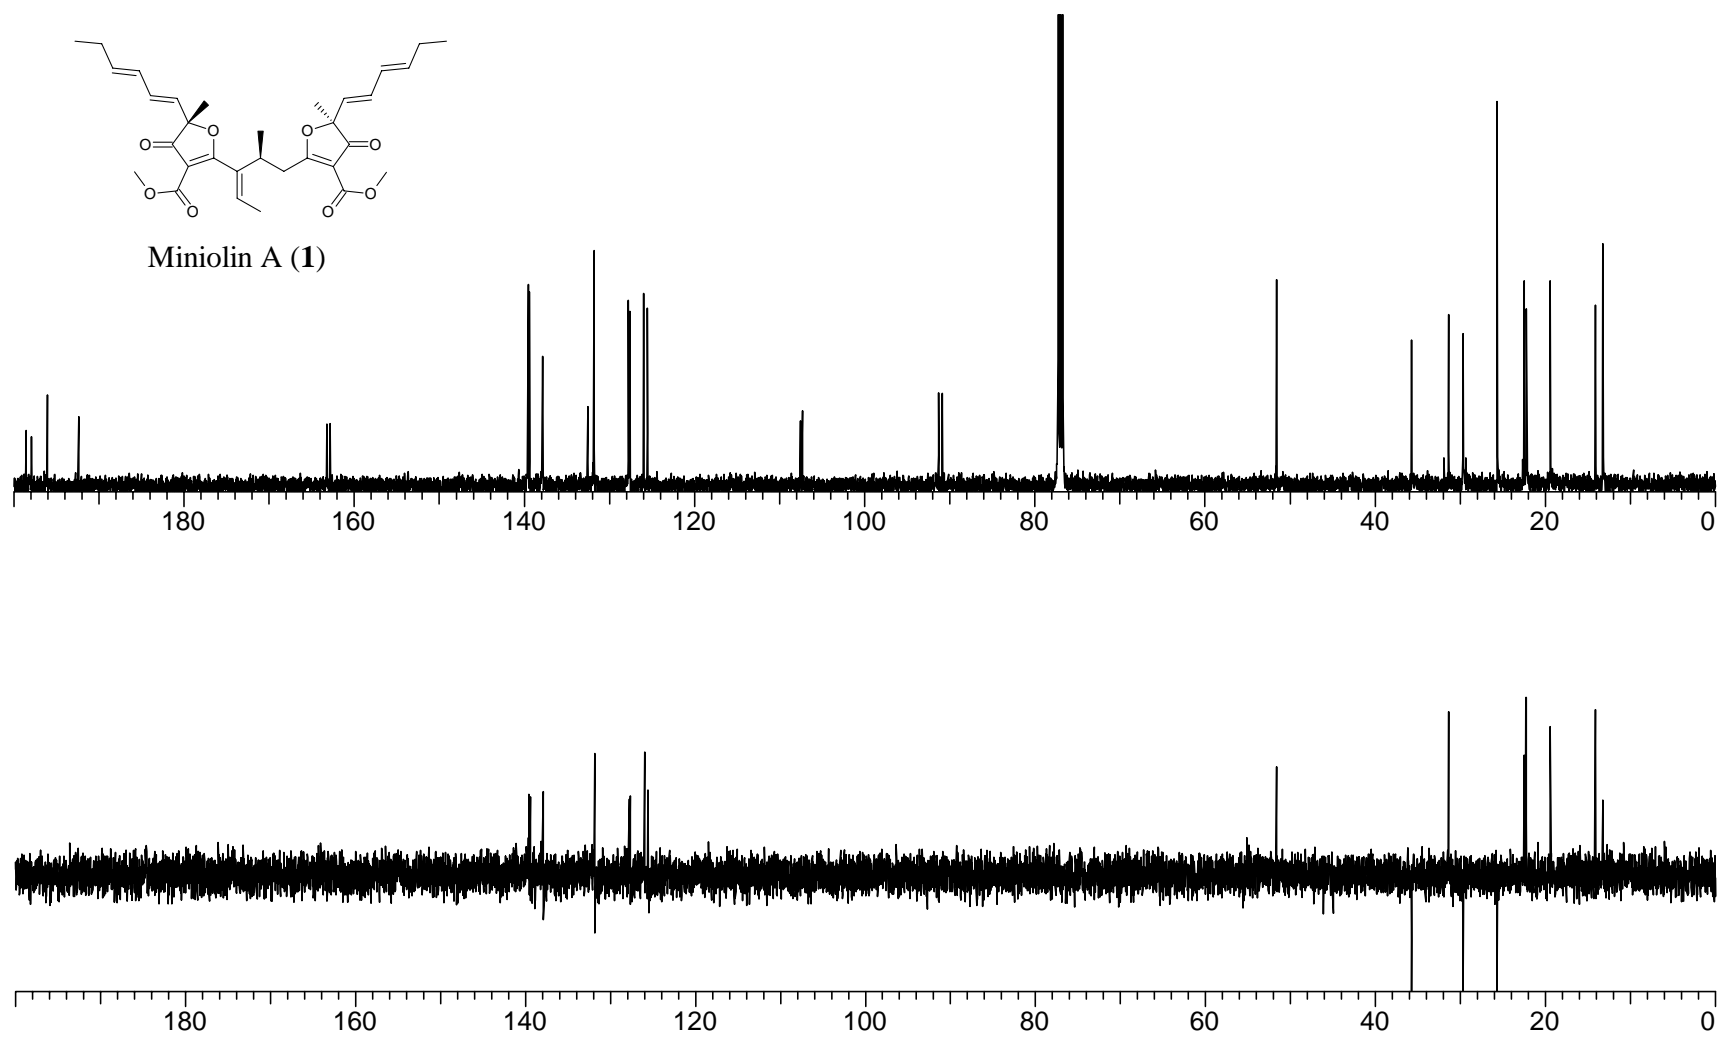

Figure S5. HSQC spectrum of 1

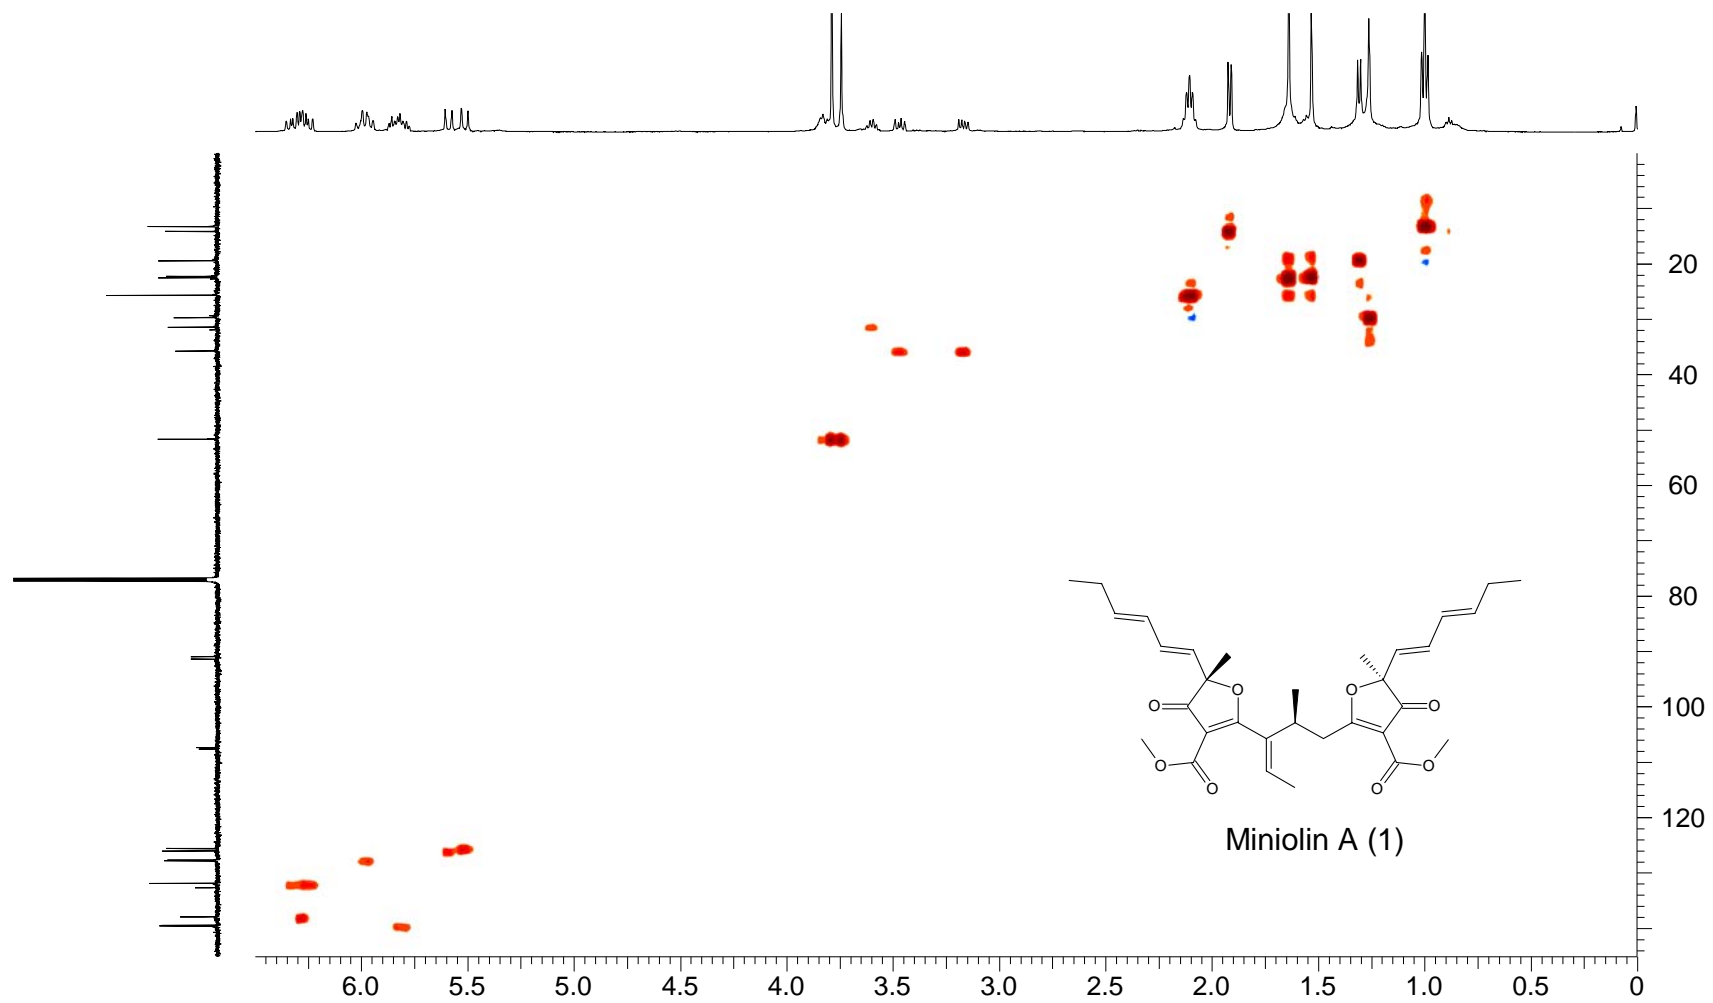

Figure S6.  $^1\text{H}$ - $^1\text{H}$  COSY spectrum of **1**

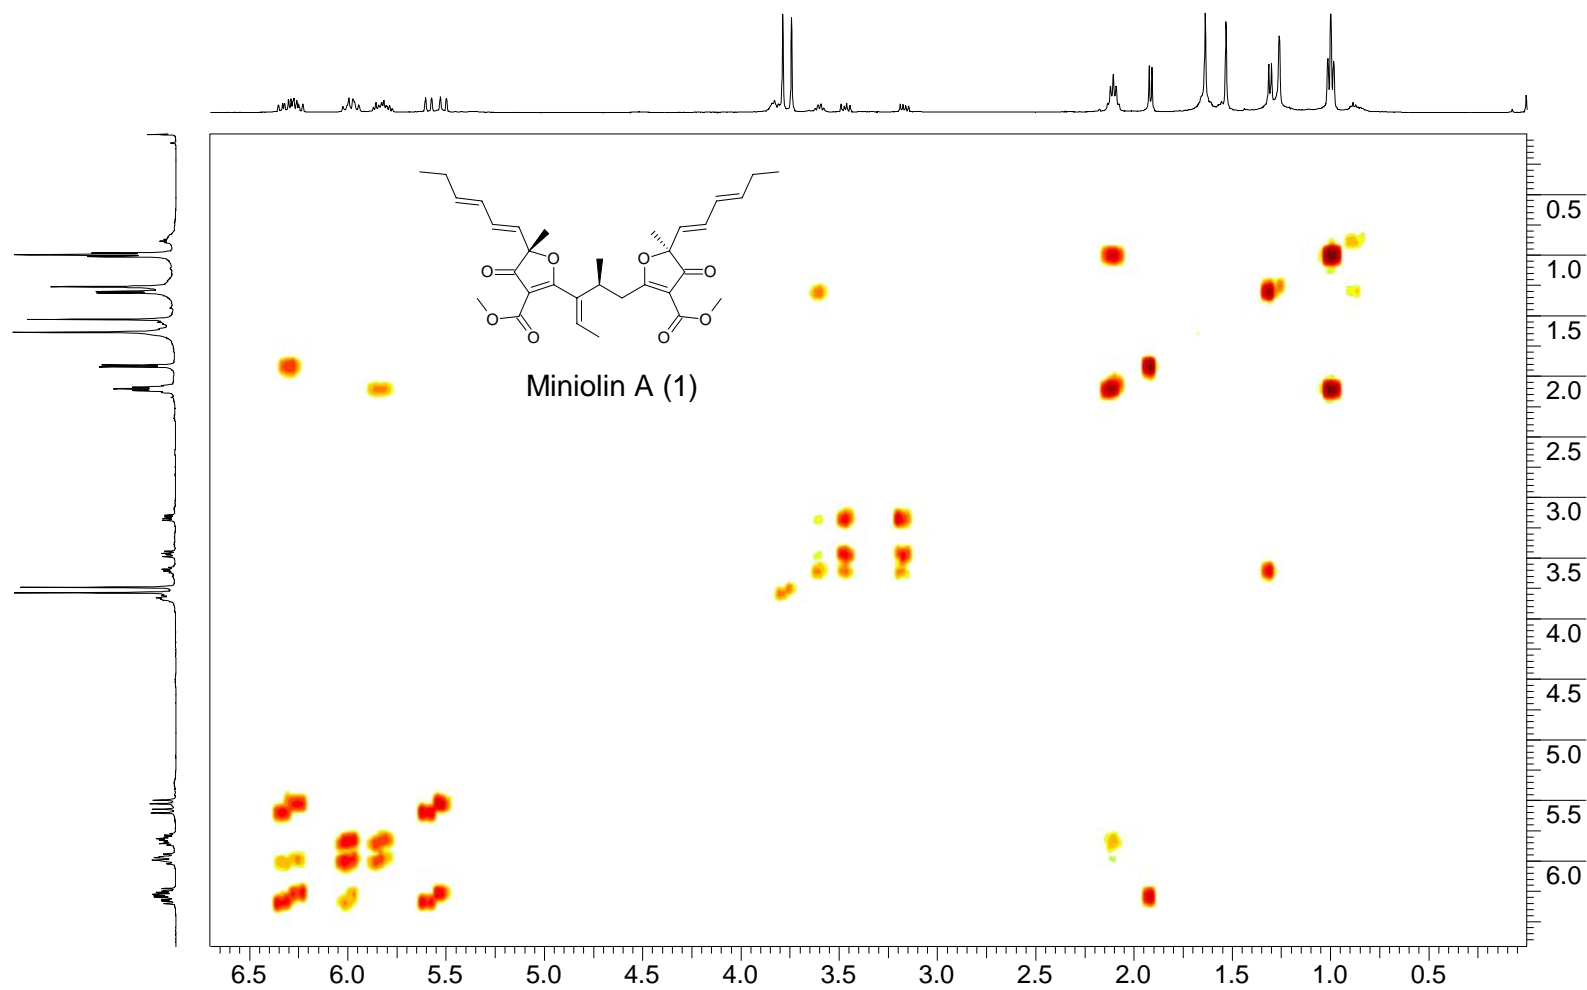



Figure S7. HMBC spectrum of 1

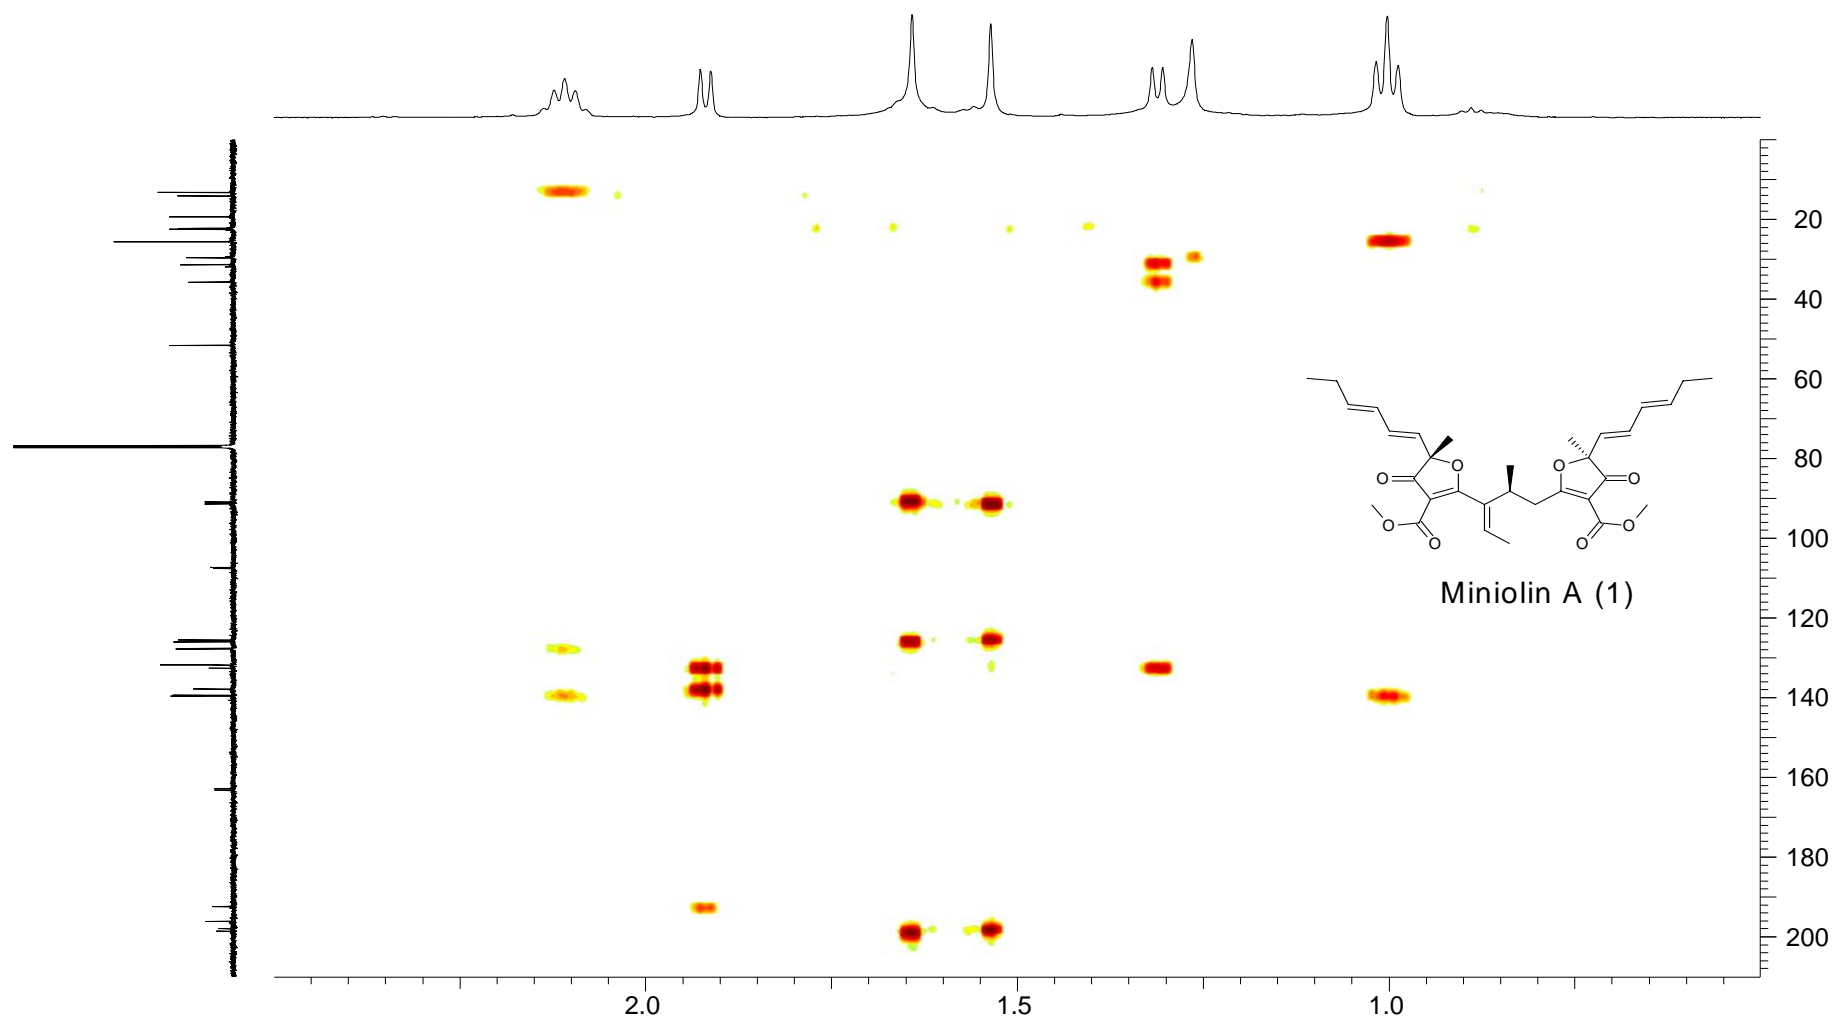

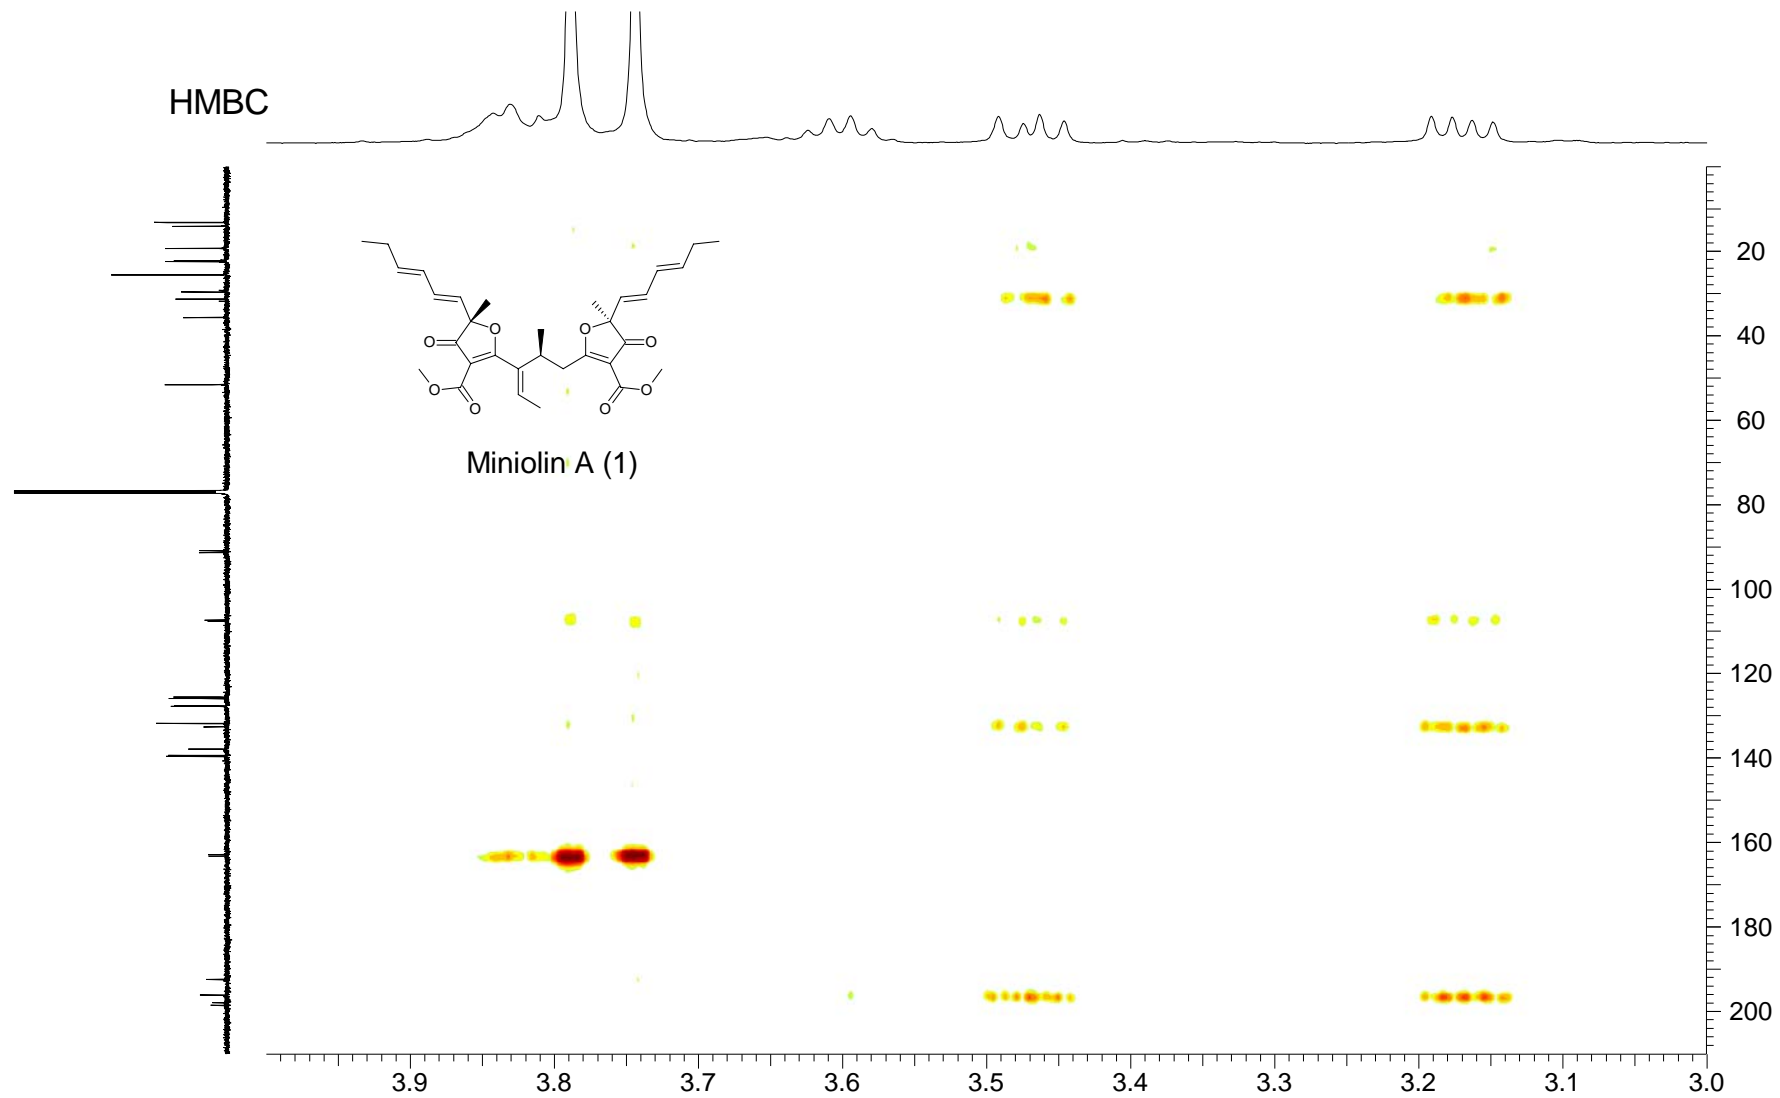

HMBC

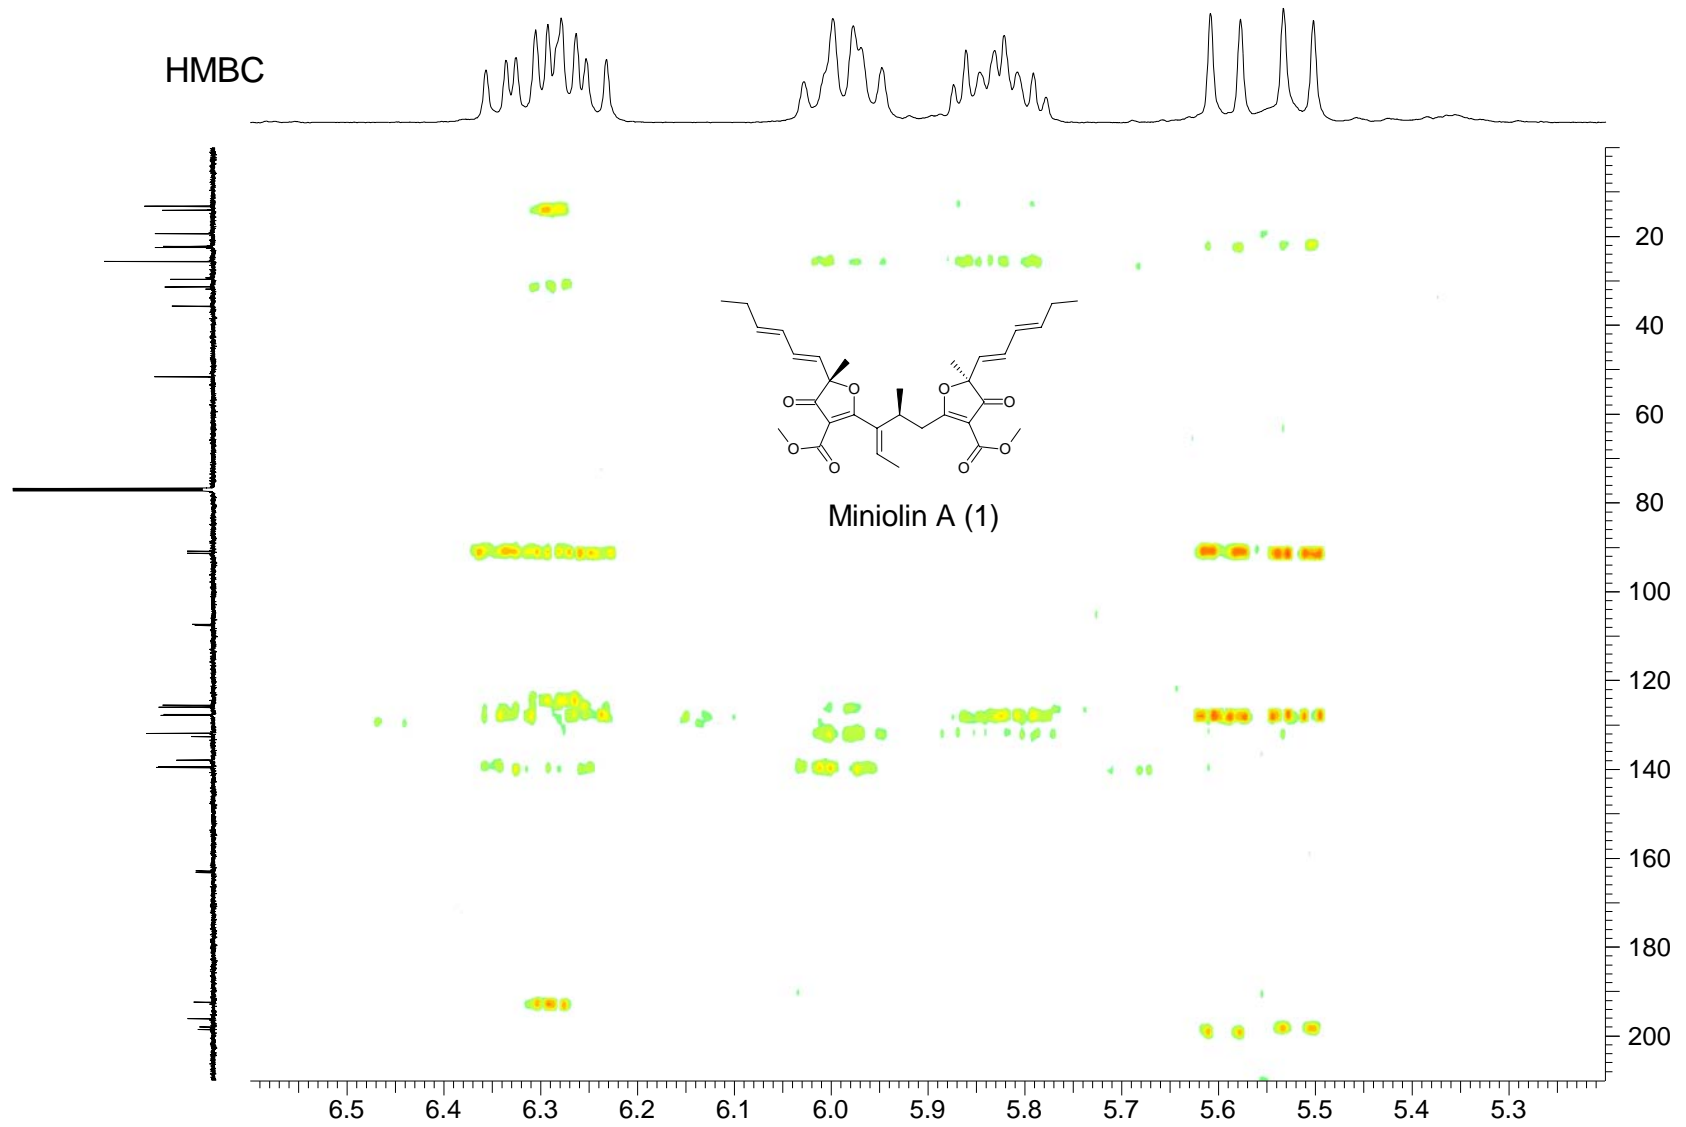

Miniolin A (1)

**Figure S8. NOESY spectrum of 1**

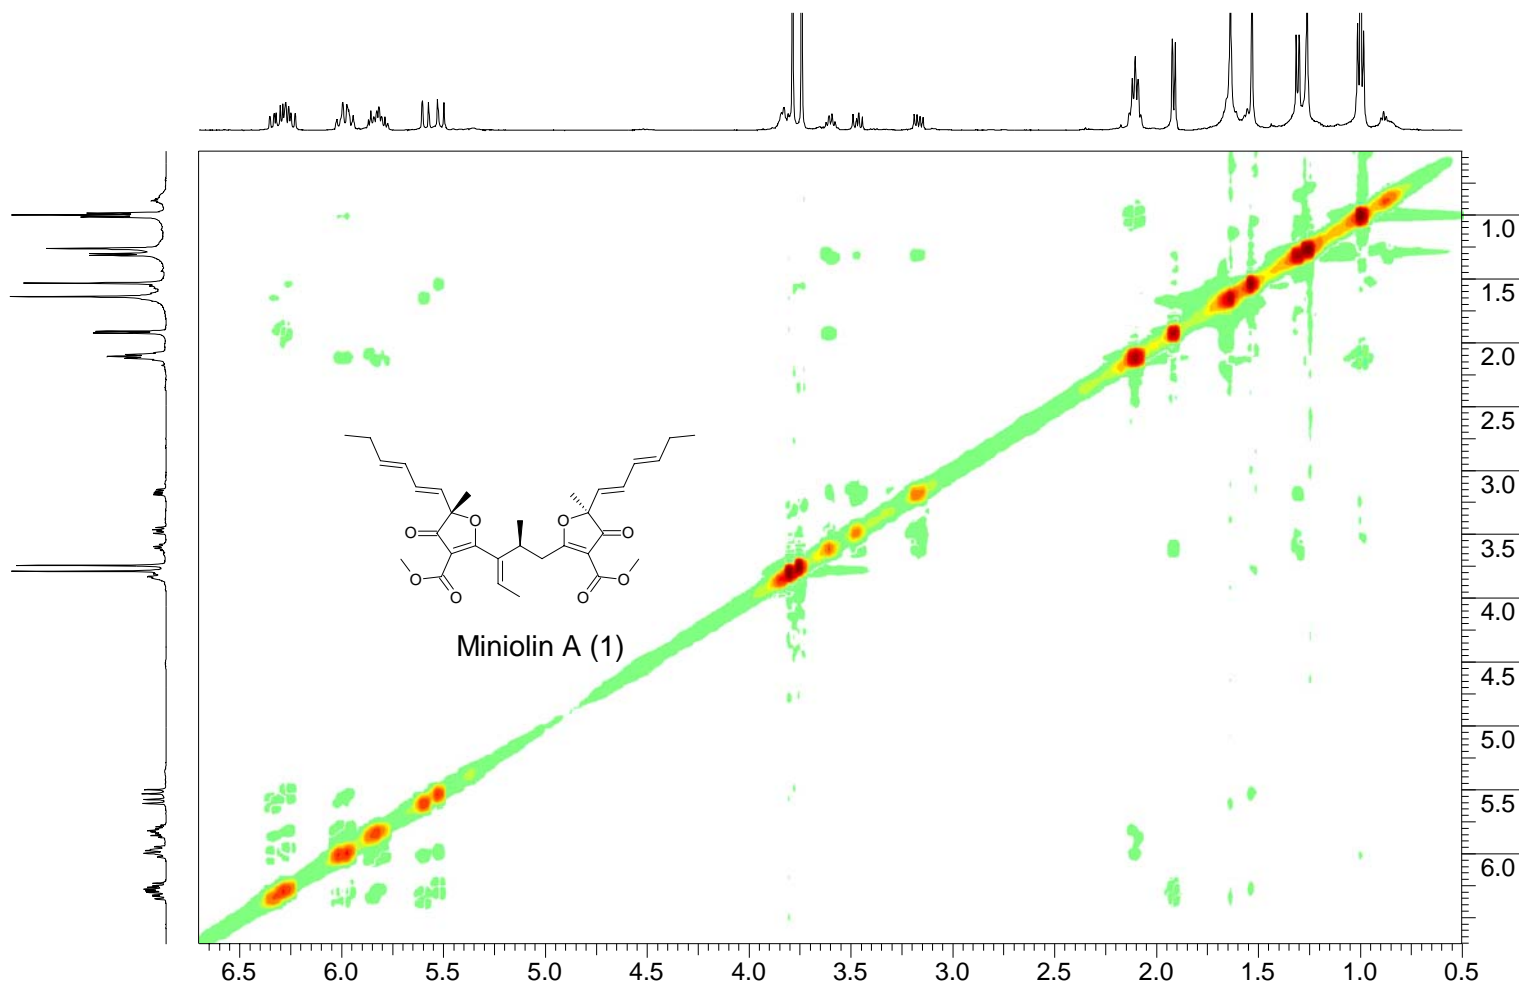

**Figure S9. Positive ESIMS spectrum of 1**

ZH-25 #84-104 RT: 0.36-0.45 AV: 21 NL: 1.65E4  
T: ITMS + c ESI Full ms [50.00-2000.00]

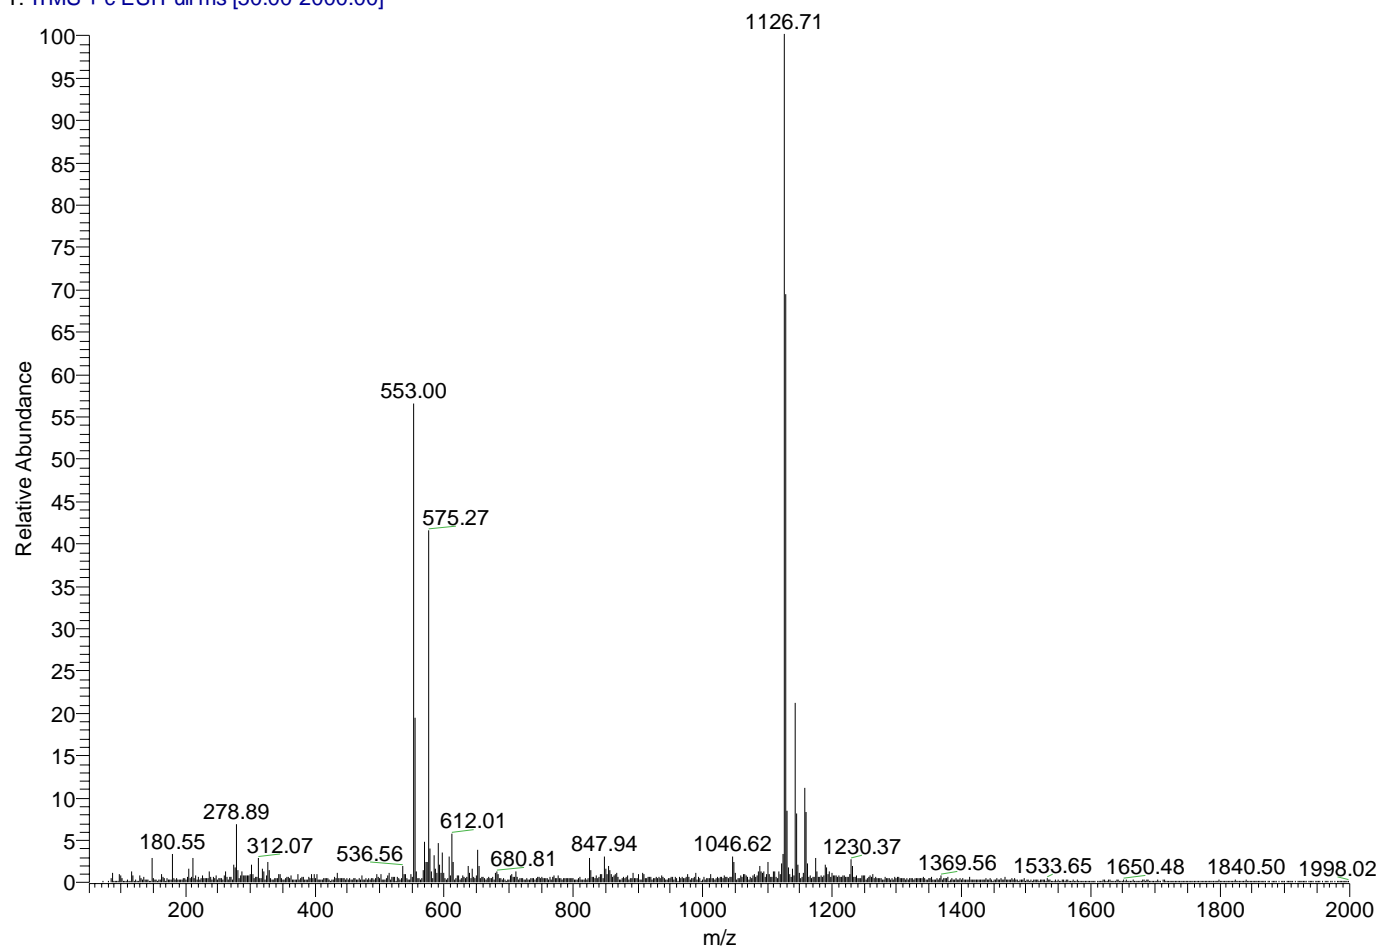

**Figure S10. HR ESIMS spectrum of 1**

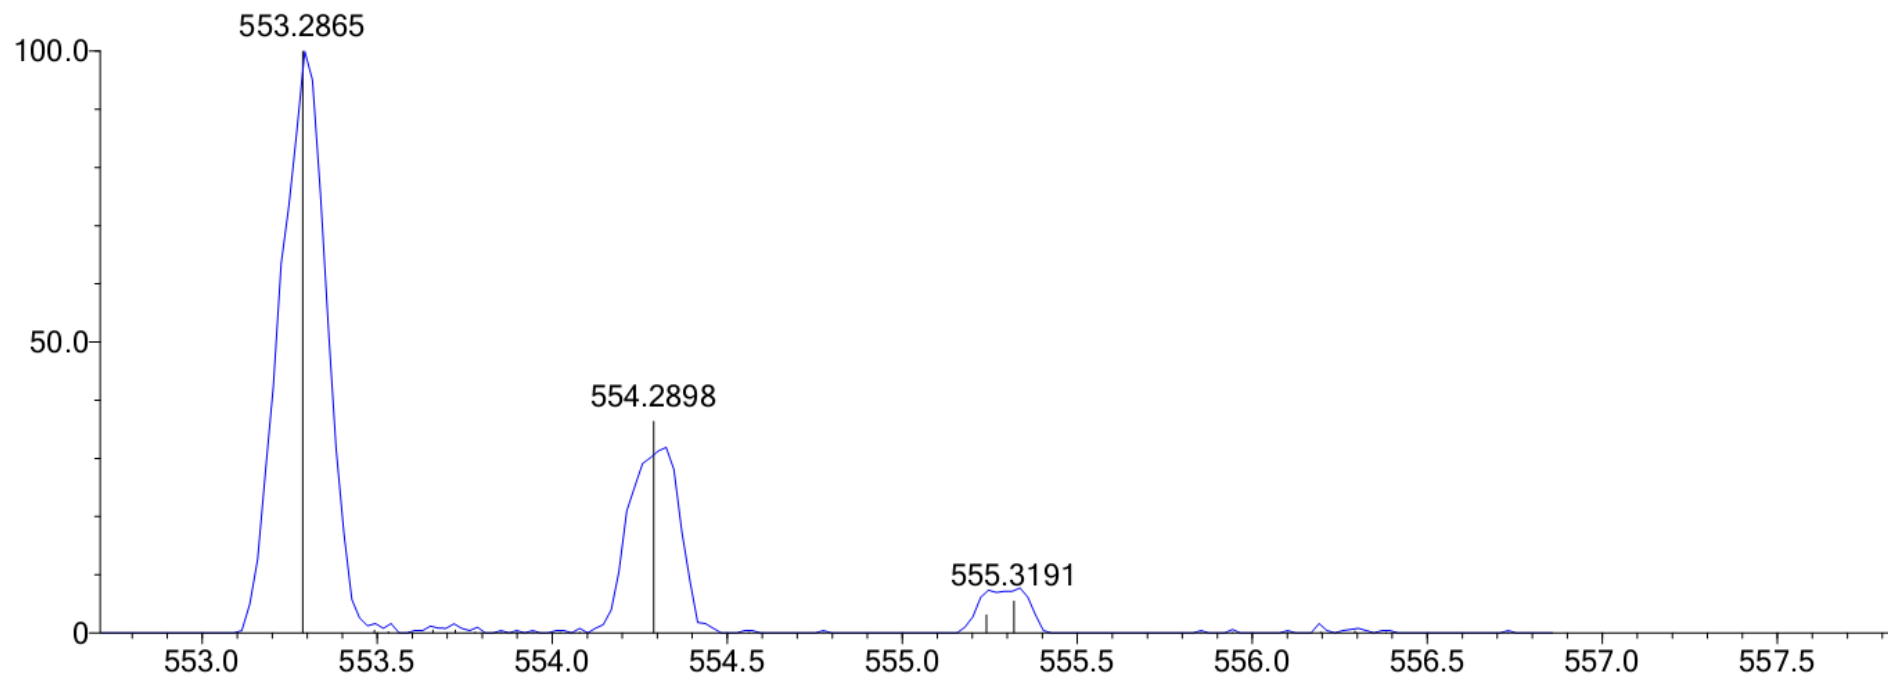

| Rank | Score | Ion                | Formula (M)                                    | Pred. m/z | Meas. m/z | Df. (mDa) | Df. (ppm) | Iso   | DBE  |
|------|-------|--------------------|------------------------------------------------|-----------|-----------|-----------|-----------|-------|------|
| 4    | 16.12 | [M+H] <sup>+</sup> | C <sub>32</sub> H <sub>40</sub> O <sub>8</sub> | 553.2796  | 553.2865  | 6.9       | 12.47     | 48.26 | 13.0 |

Figure S11. IR spectrum of 1

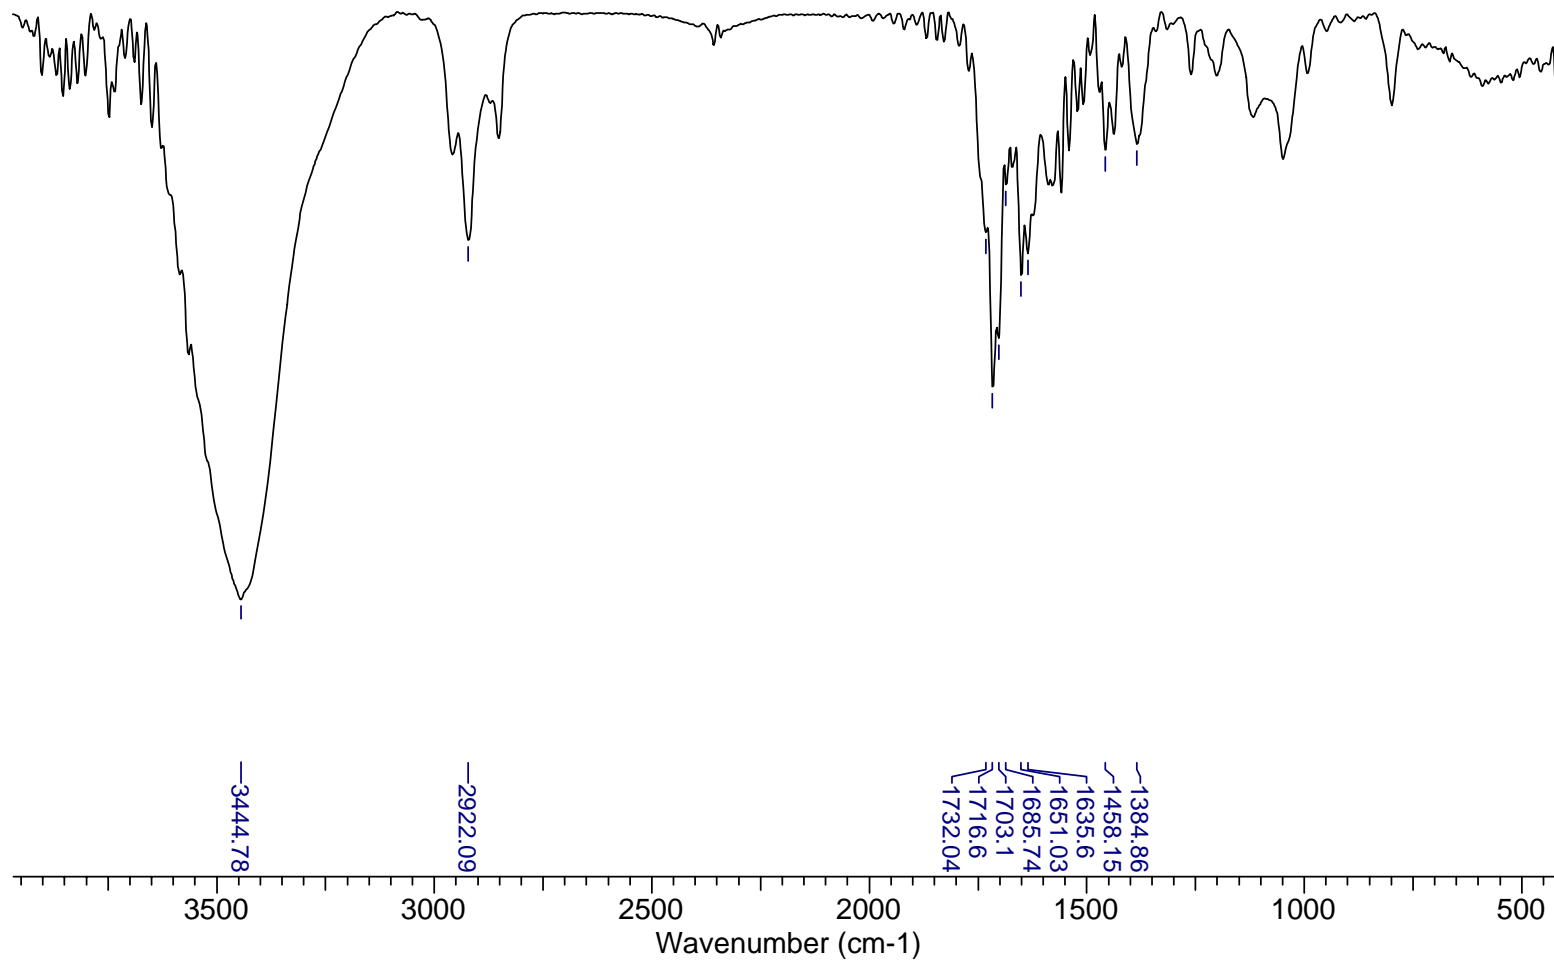

**Figure S12. UV and CD spectra of 1**

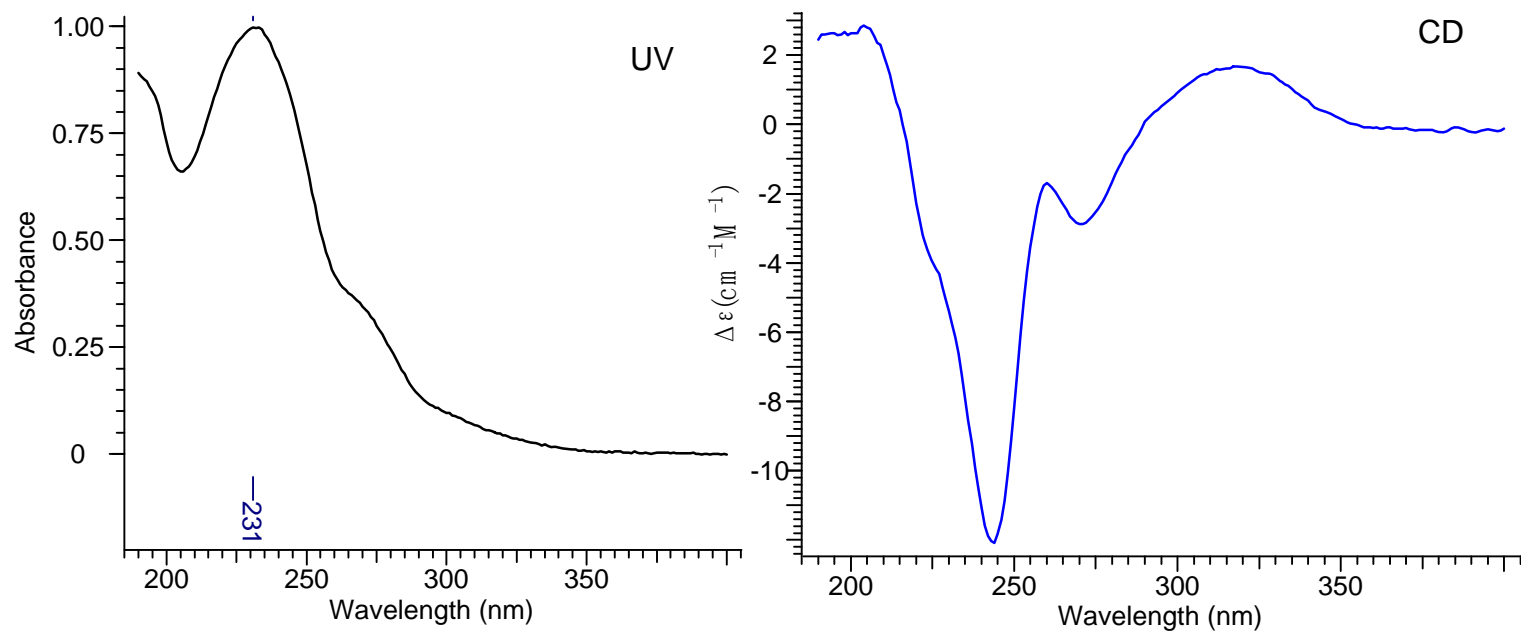



**Figure S13.**  $^1\text{H}$  NMR spectrum of **2** in  $\text{CDCl}_3$  (500 MHz)

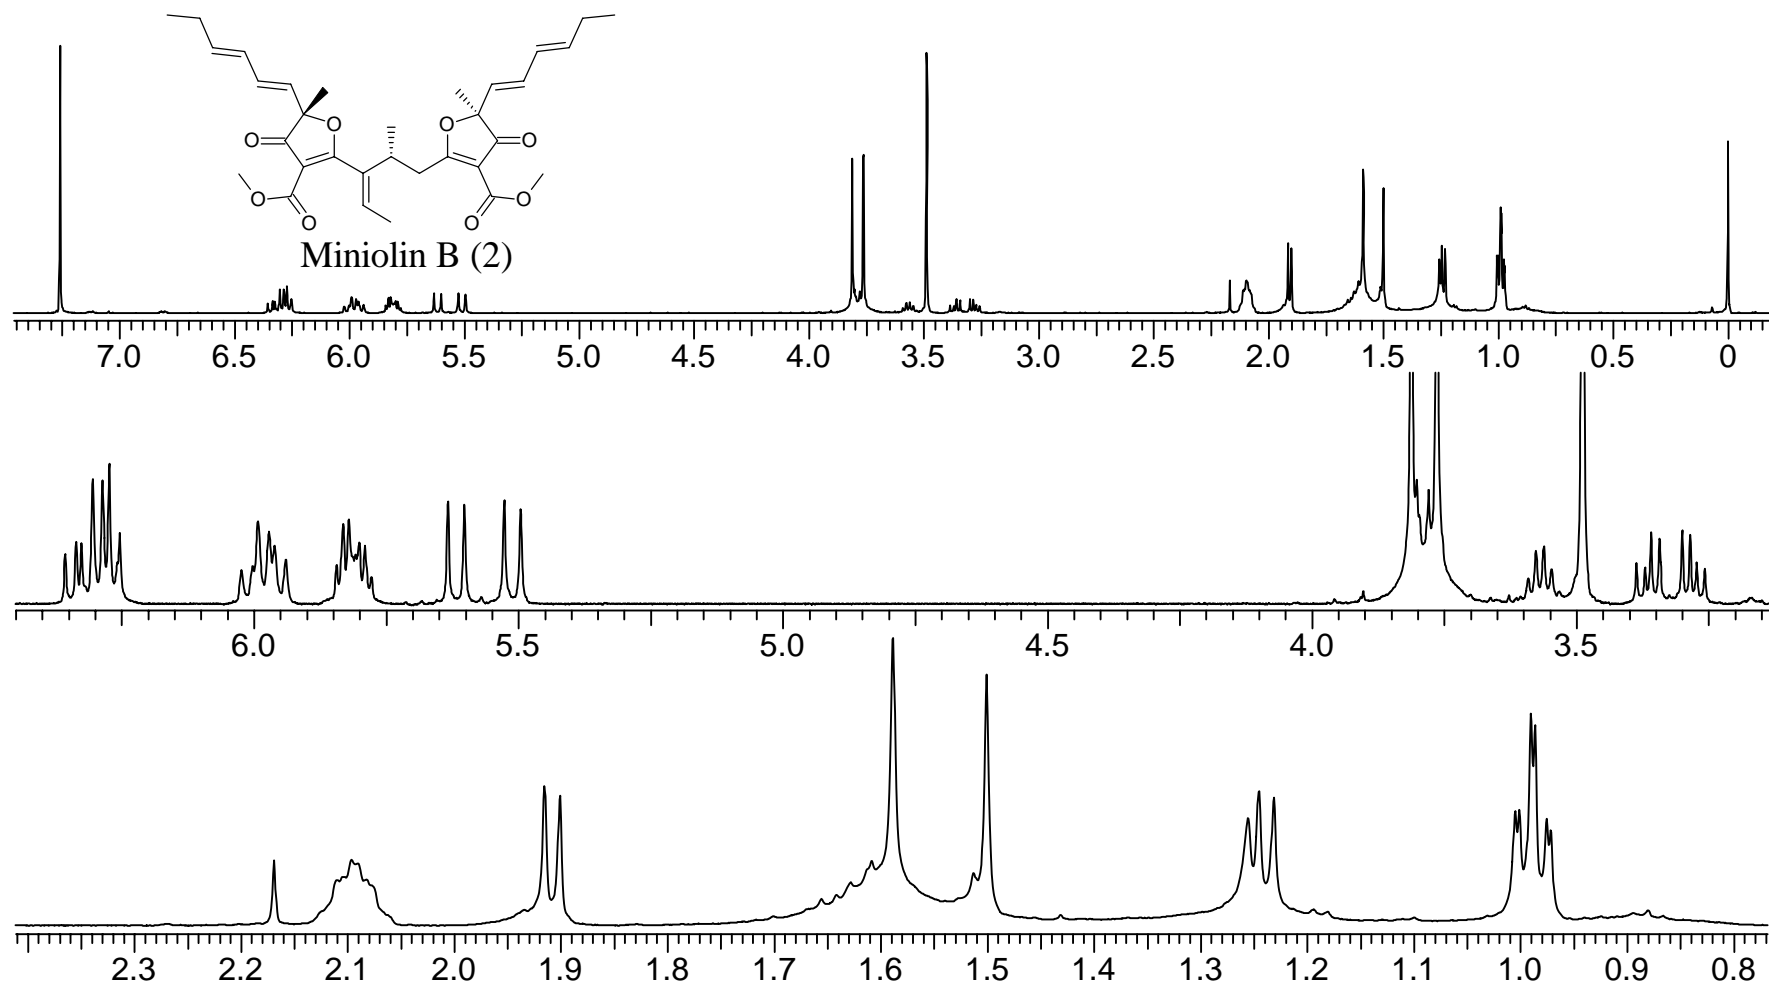

Figure S14.  $^{13}\text{C}$  NMR and DEPT of 2 in  $\text{CDCl}_3$  (125 MHz)

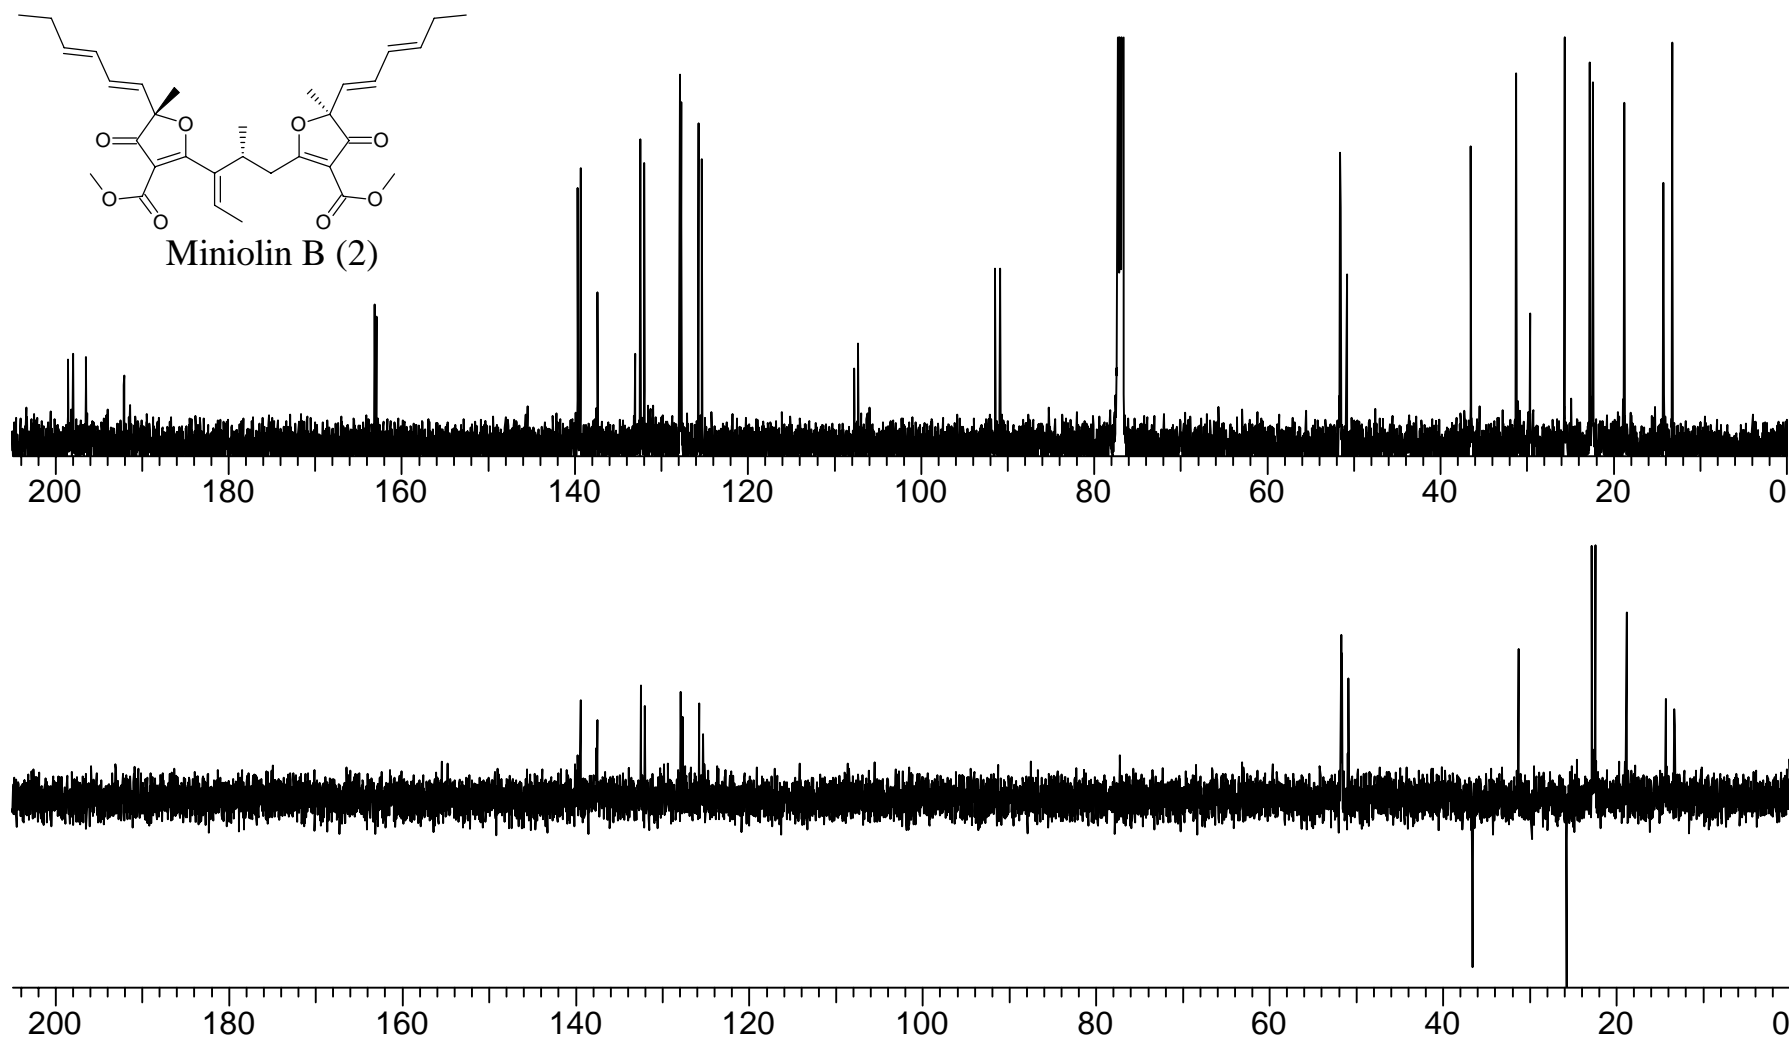

Figure S15. HSQC spectrum of 2

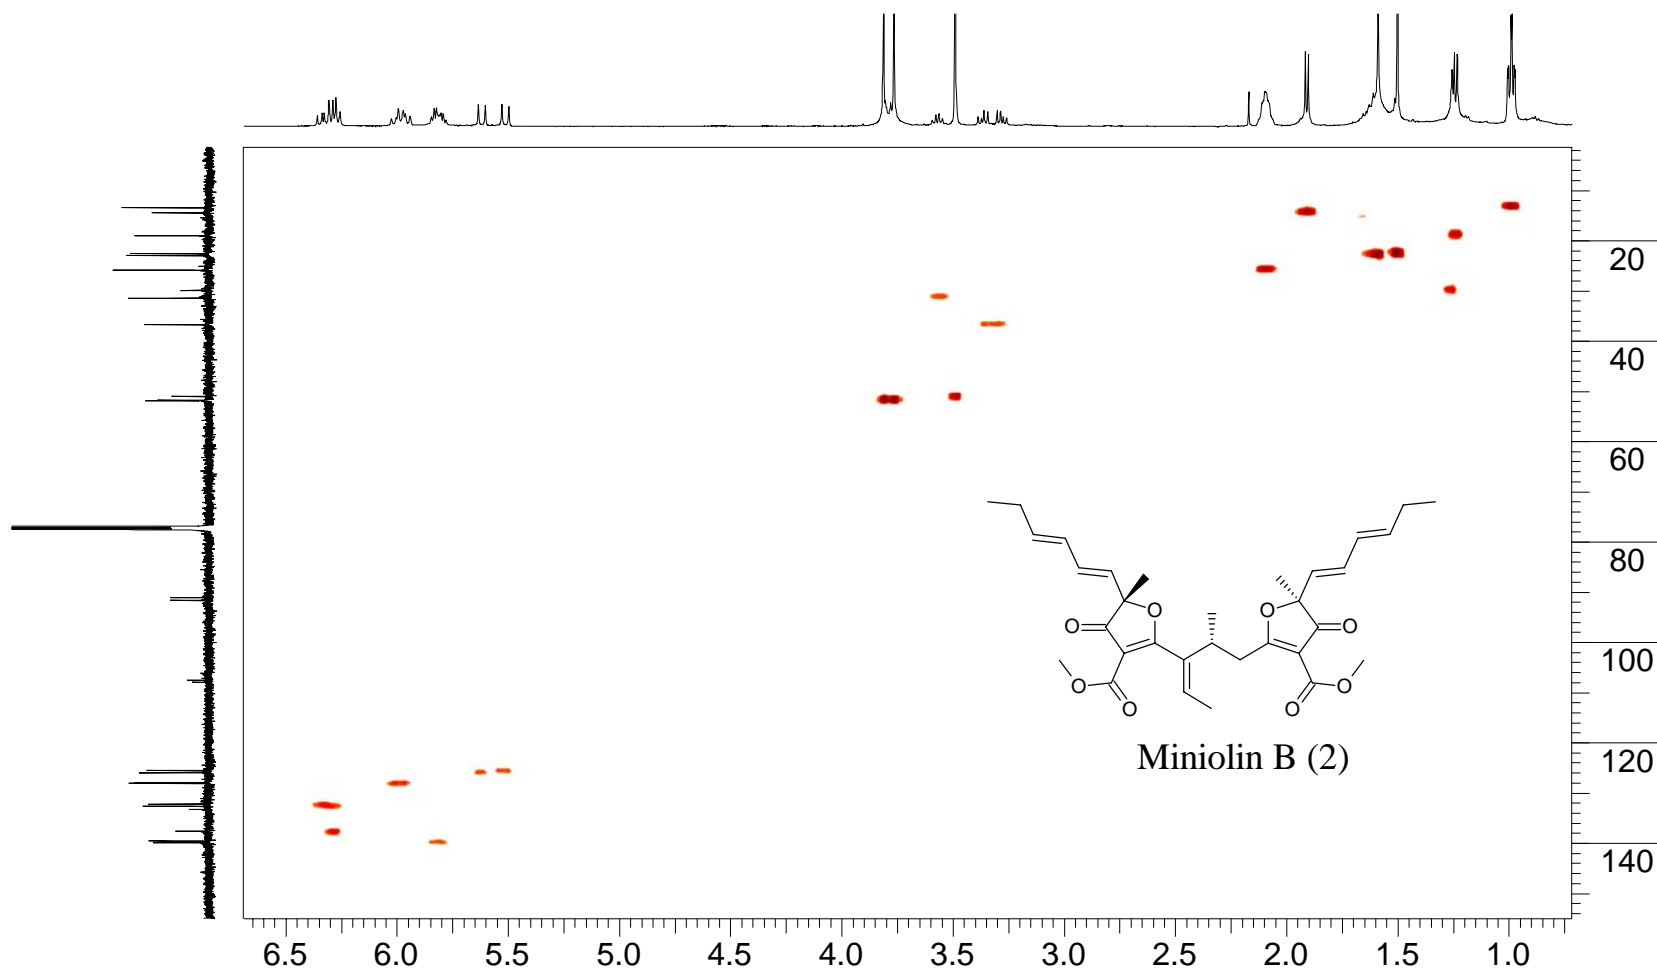

Figure S16.  $^1\text{H}$ - $^1\text{H}$  COSY spectrum of 2

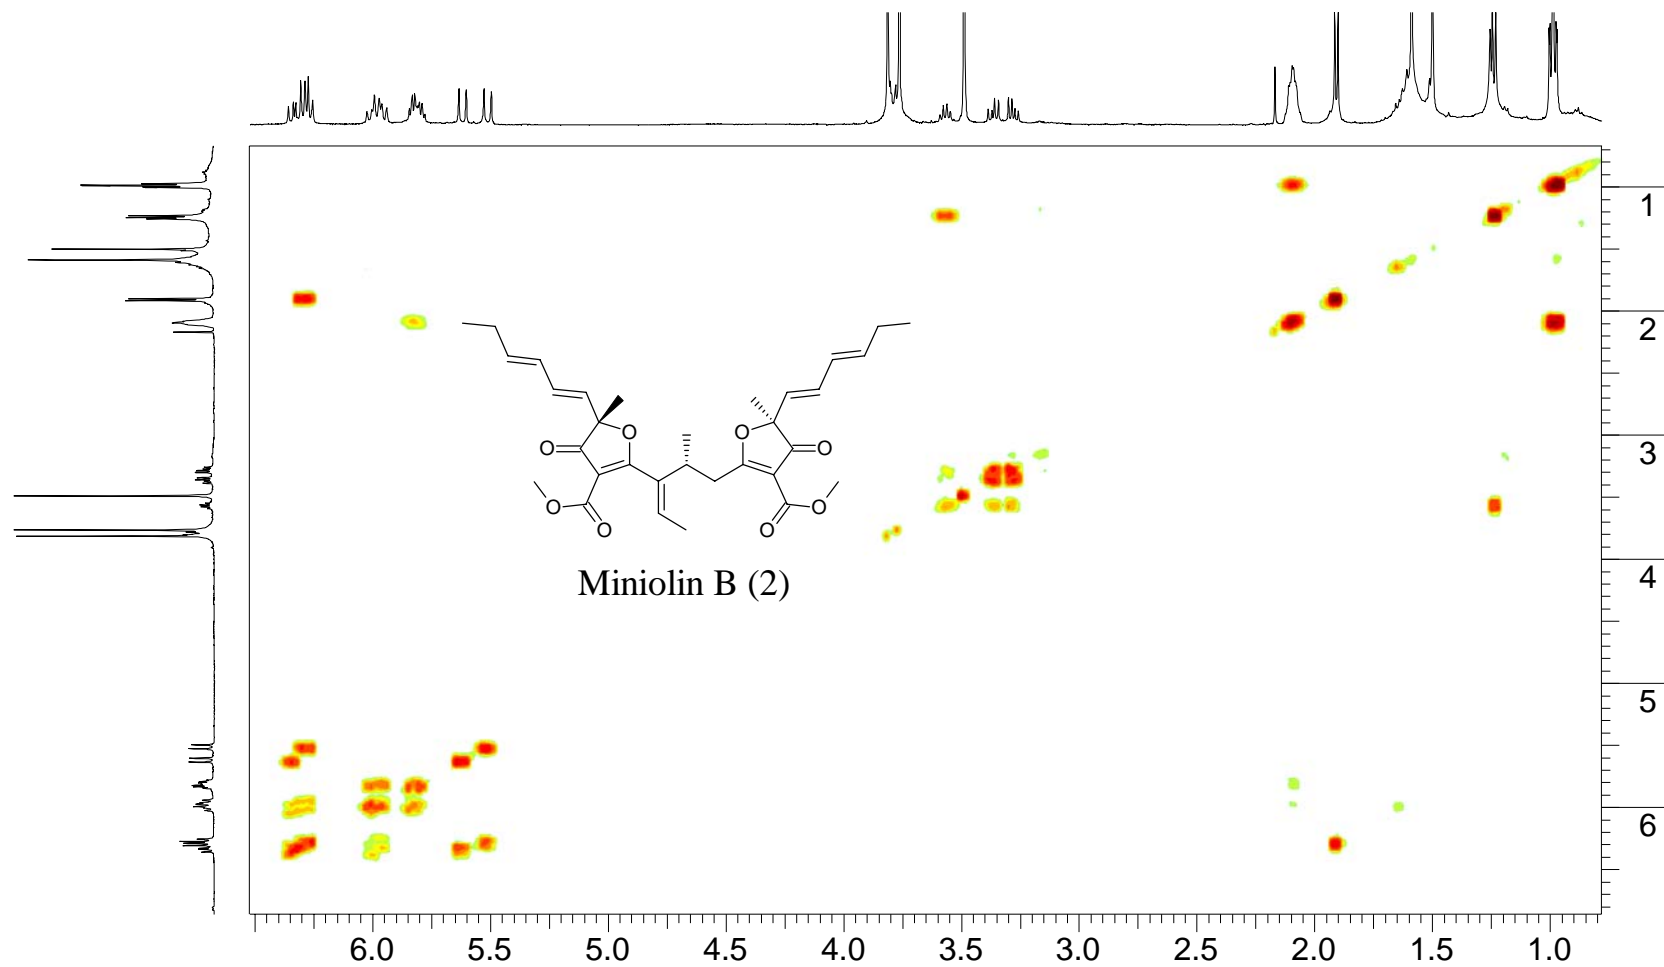

Figure S17. HMBC spectrum of 2

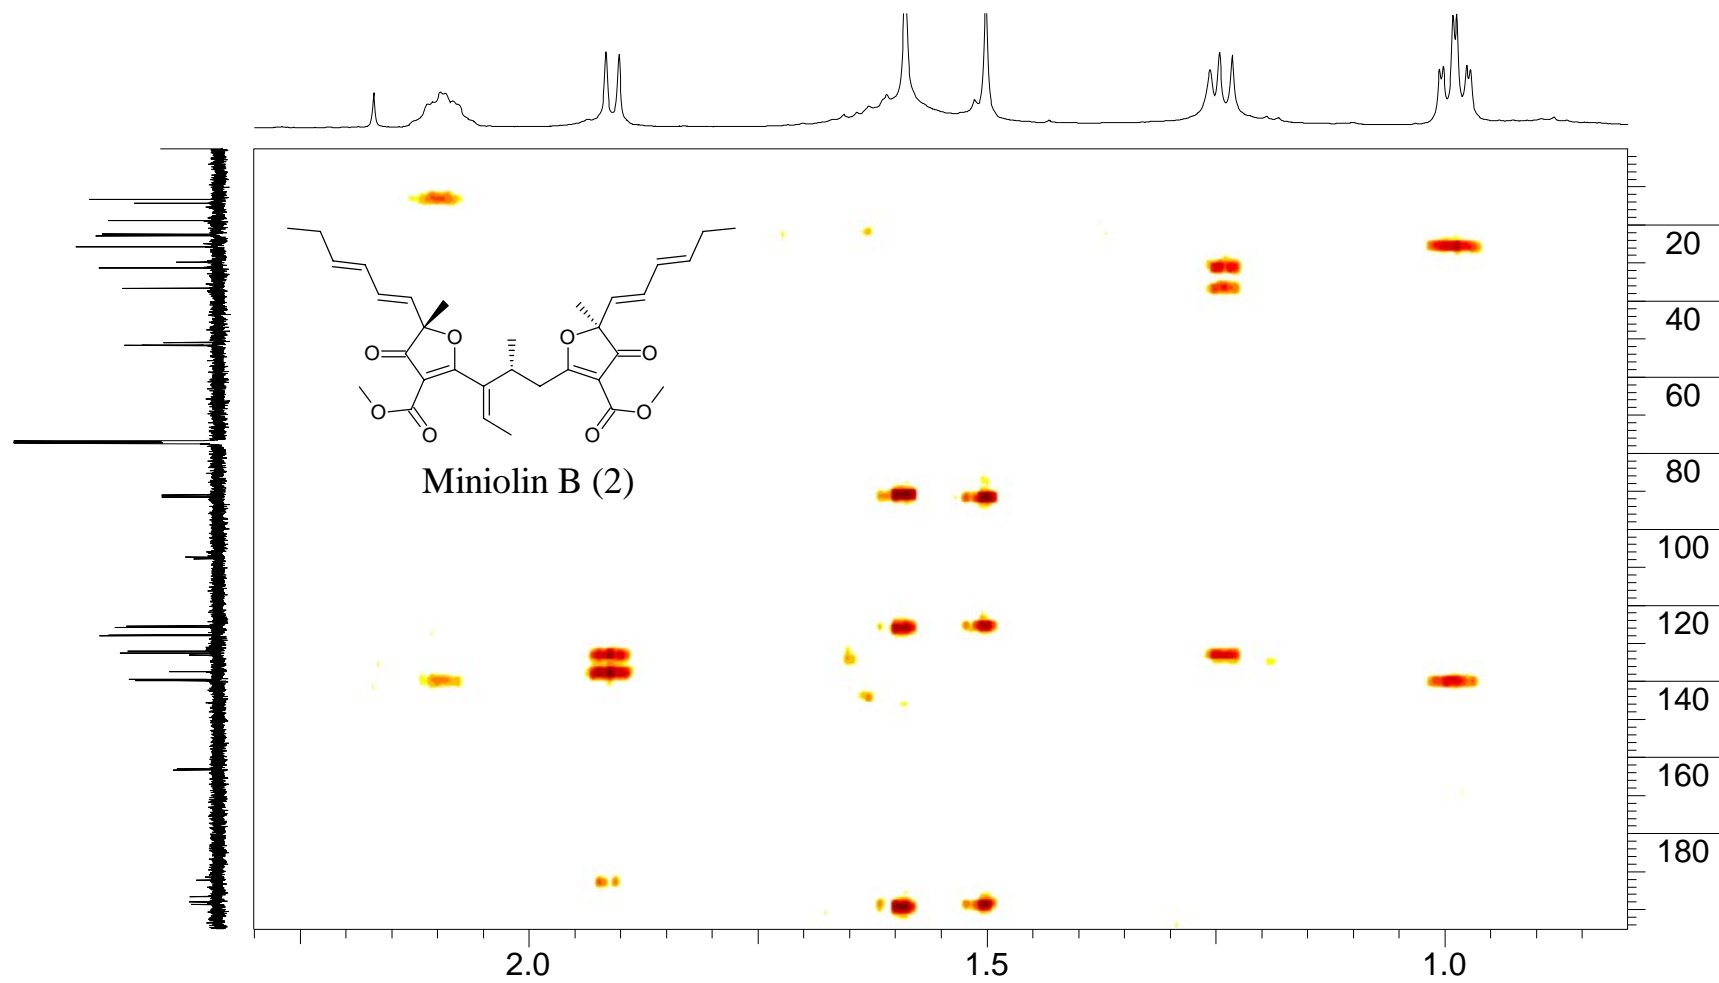

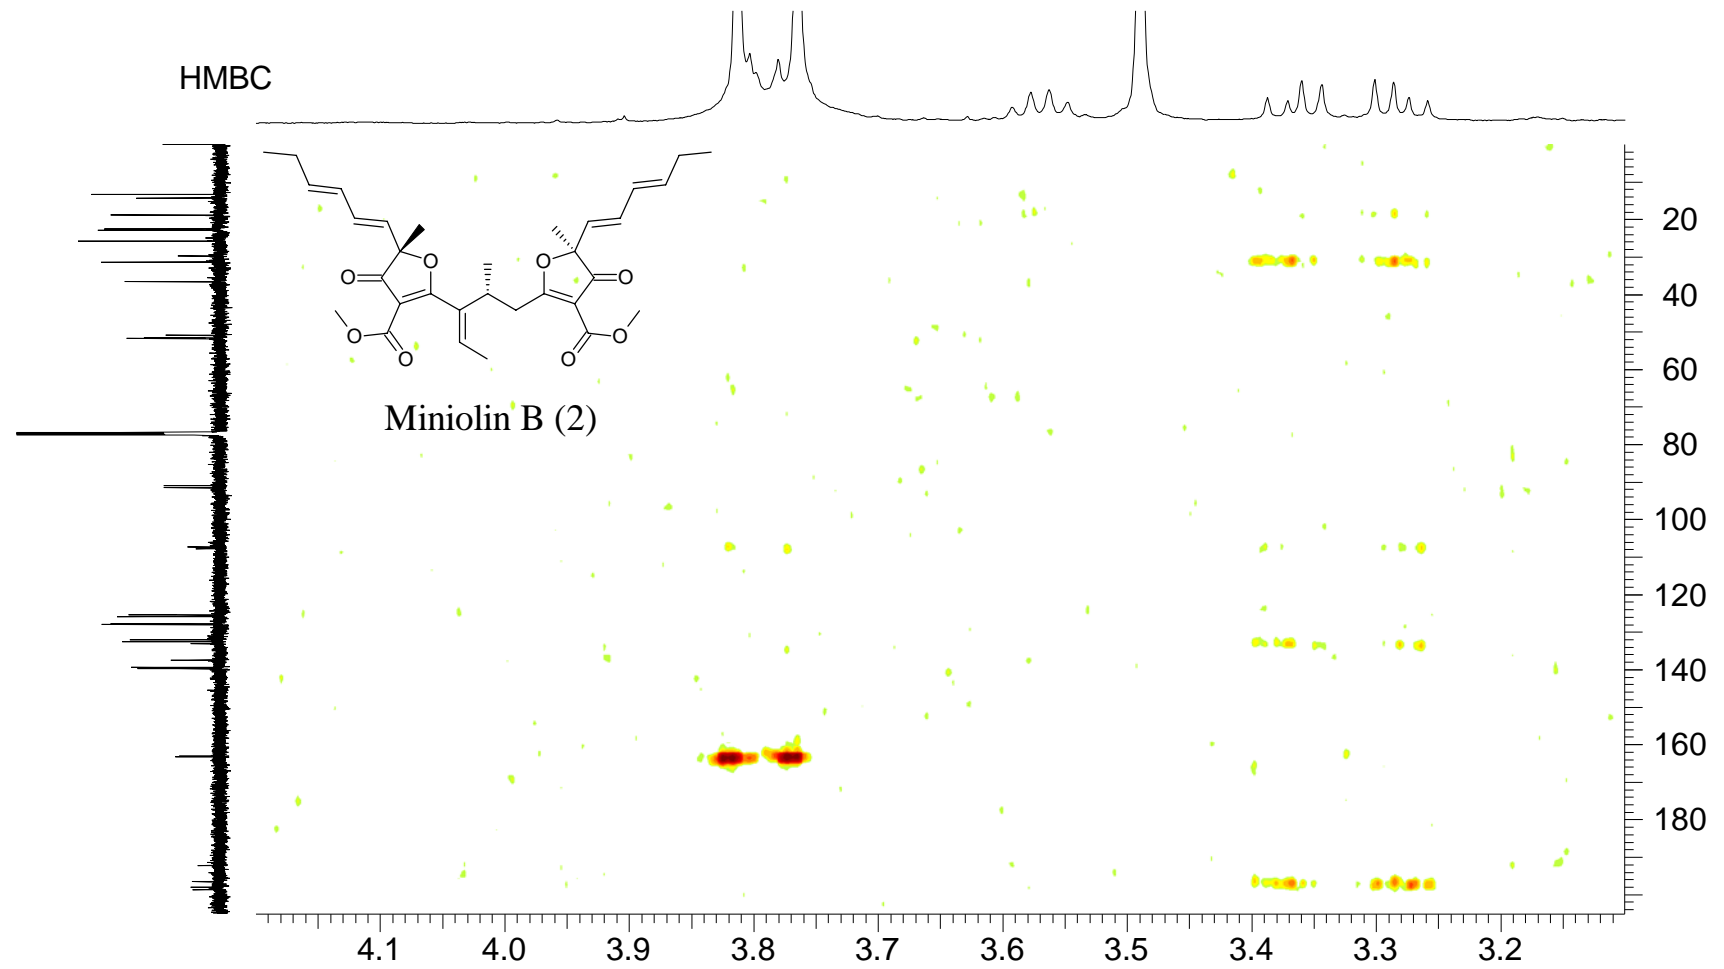

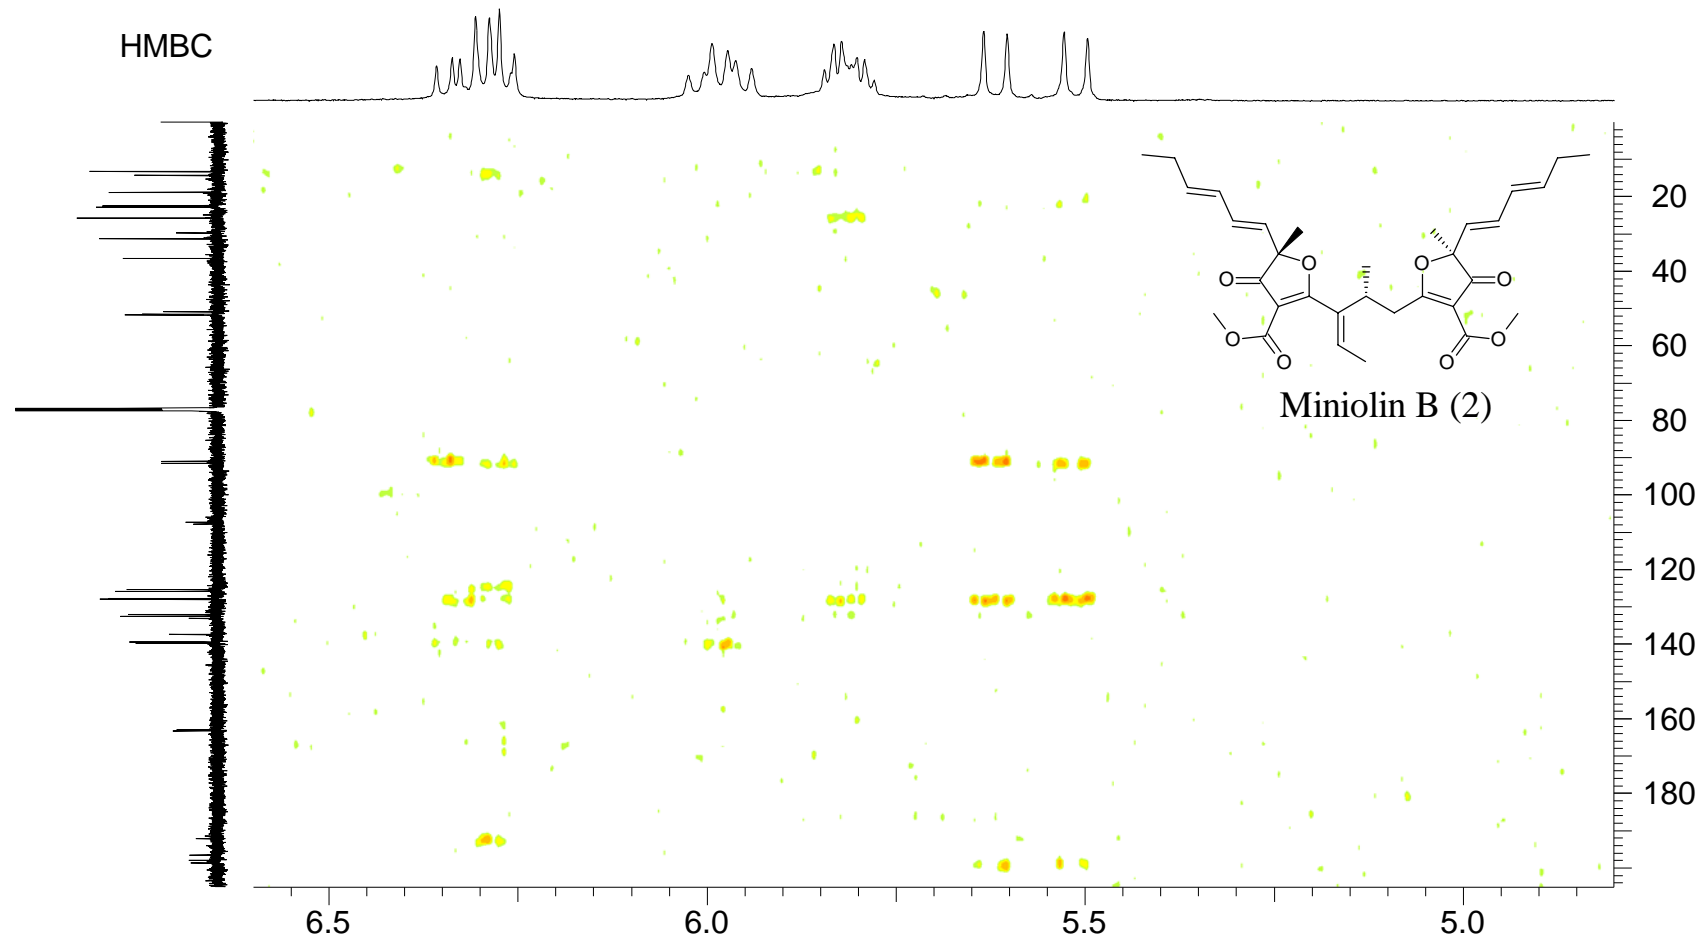

Figure S18. NOESY spectrum of 2

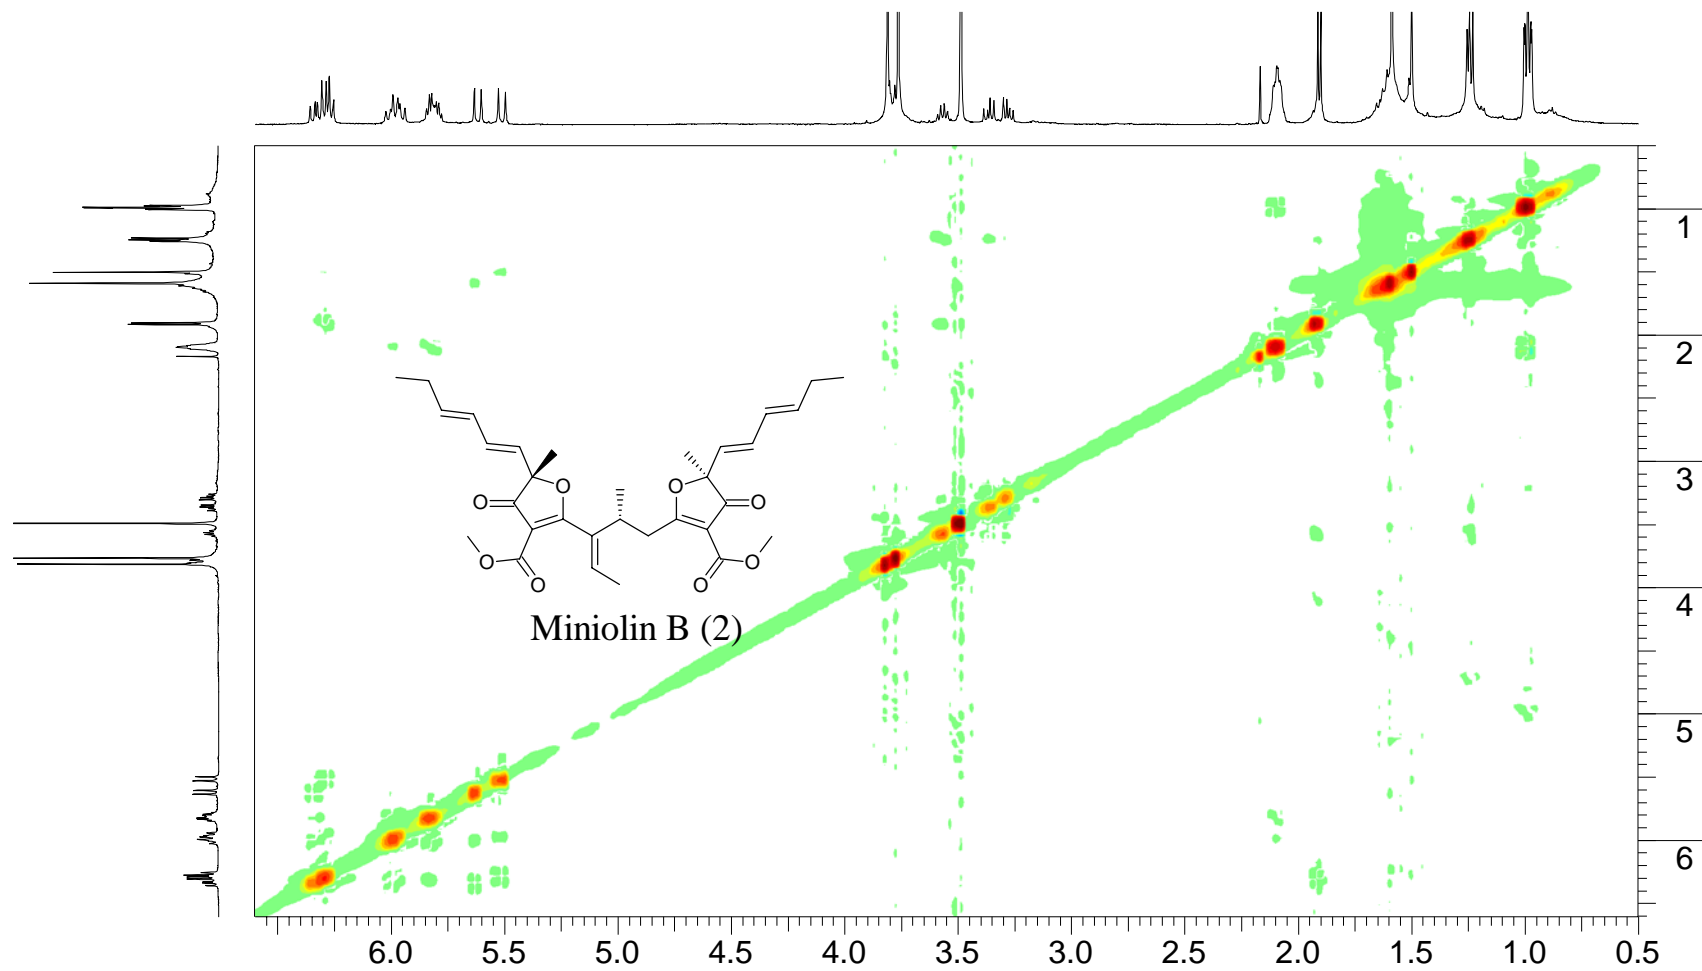



**Figure S19. Positive ESIMS spectrum of 2**

ZH-26 #17-20 RT: 0.07-0.08 AV: 4 NL: 1.28E4  
T: ITMS + c ESI Full ms [50.00-2000.00]

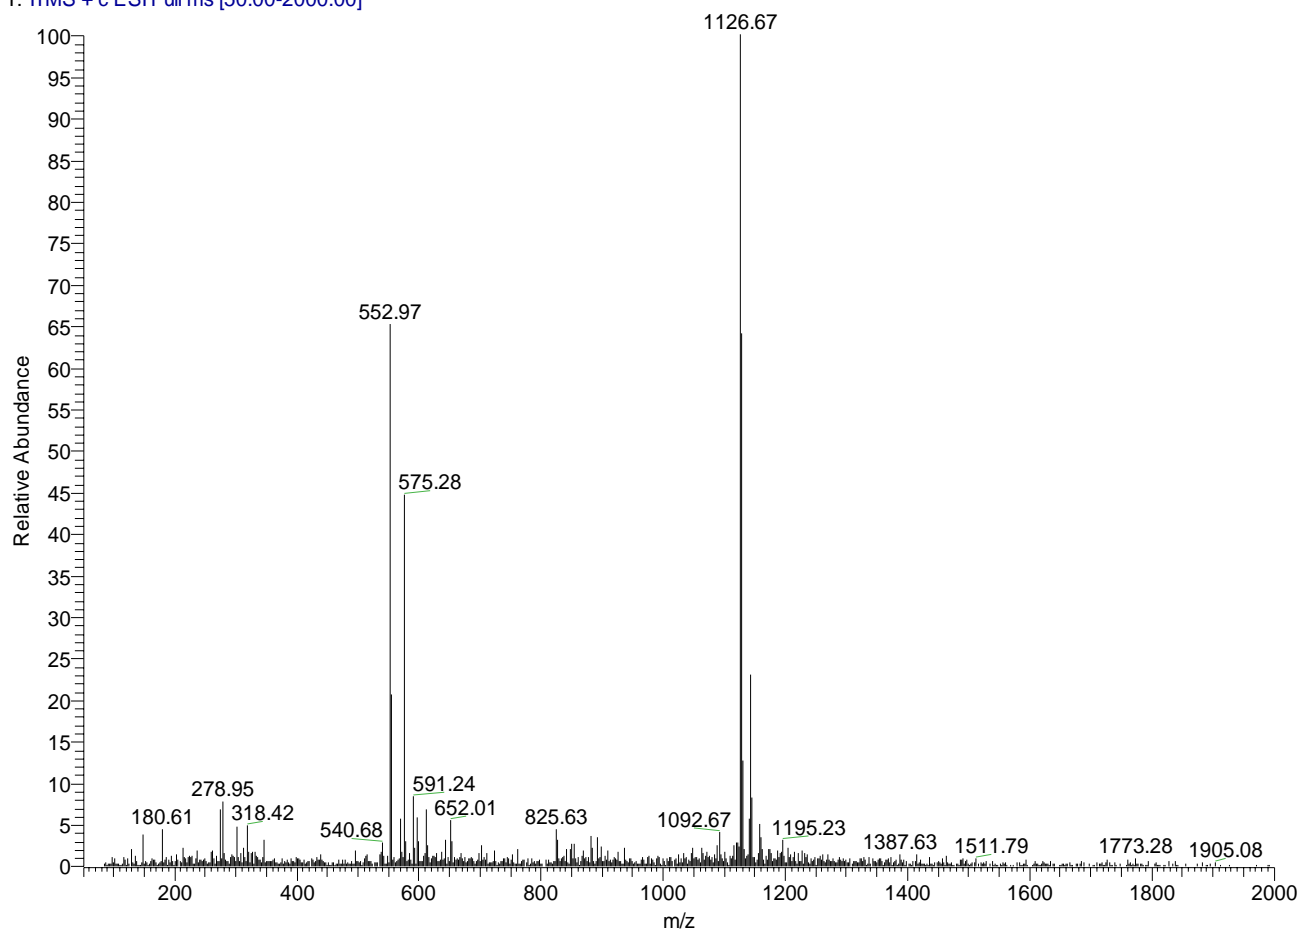

**Figure S20. HR ESIMS spectrum of 2**

Measured region for 553.2826 m/z

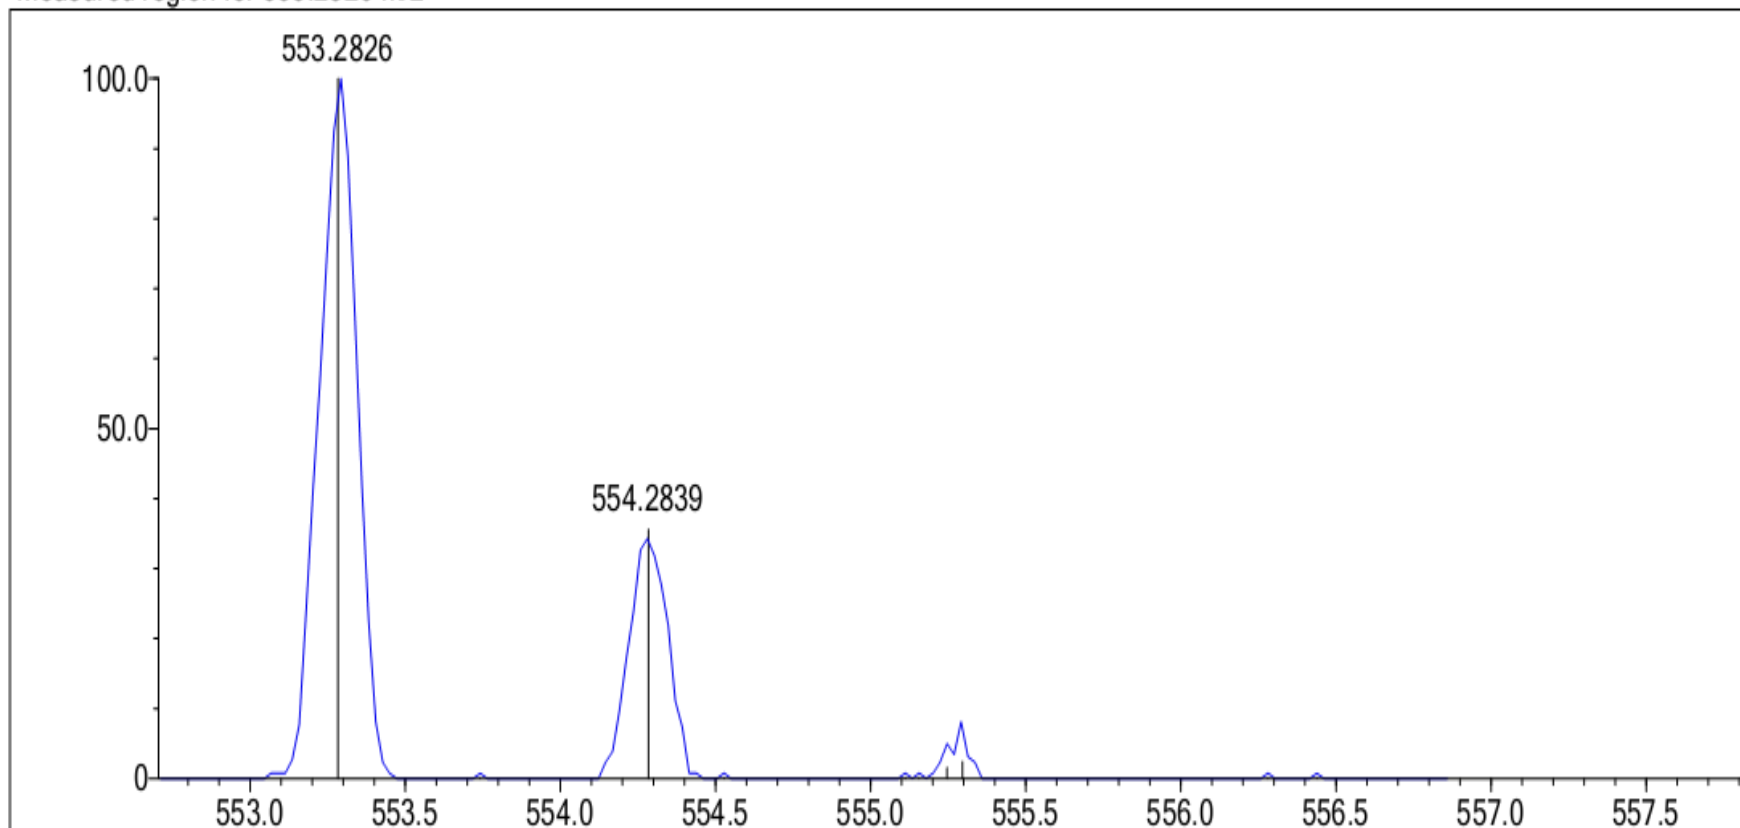

| Rank | Score | Ion                | Formula (M)                                    | Pred. m/z | Meas. m/z | Df. (mDa) | Df. (ppm) | Iso   | DBE  |
|------|-------|--------------------|------------------------------------------------|-----------|-----------|-----------|-----------|-------|------|
| 1    | 83.32 | [M+H] <sup>+</sup> | C <sub>32</sub> H <sub>40</sub> O <sub>8</sub> | 553.2796  | 553.2826  | 3.0       | 5.42      | 97.11 | 13.0 |

Figure S21. IR spectrum of 2

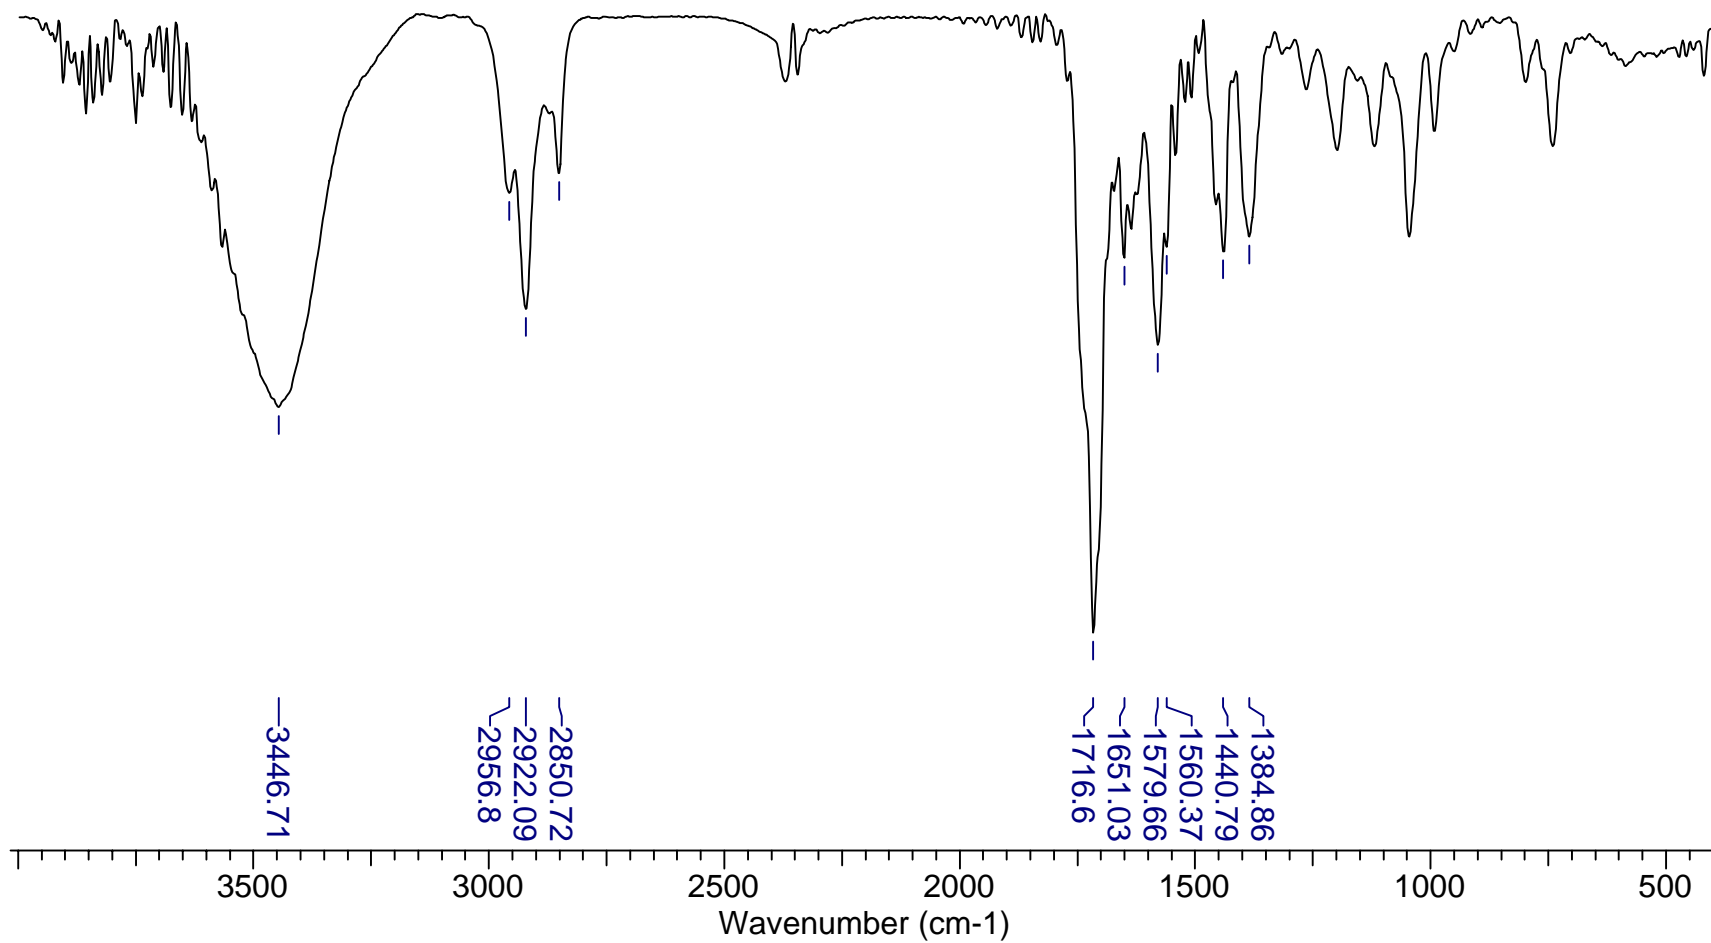

**Figure S22. UV and CD spectra of 2**

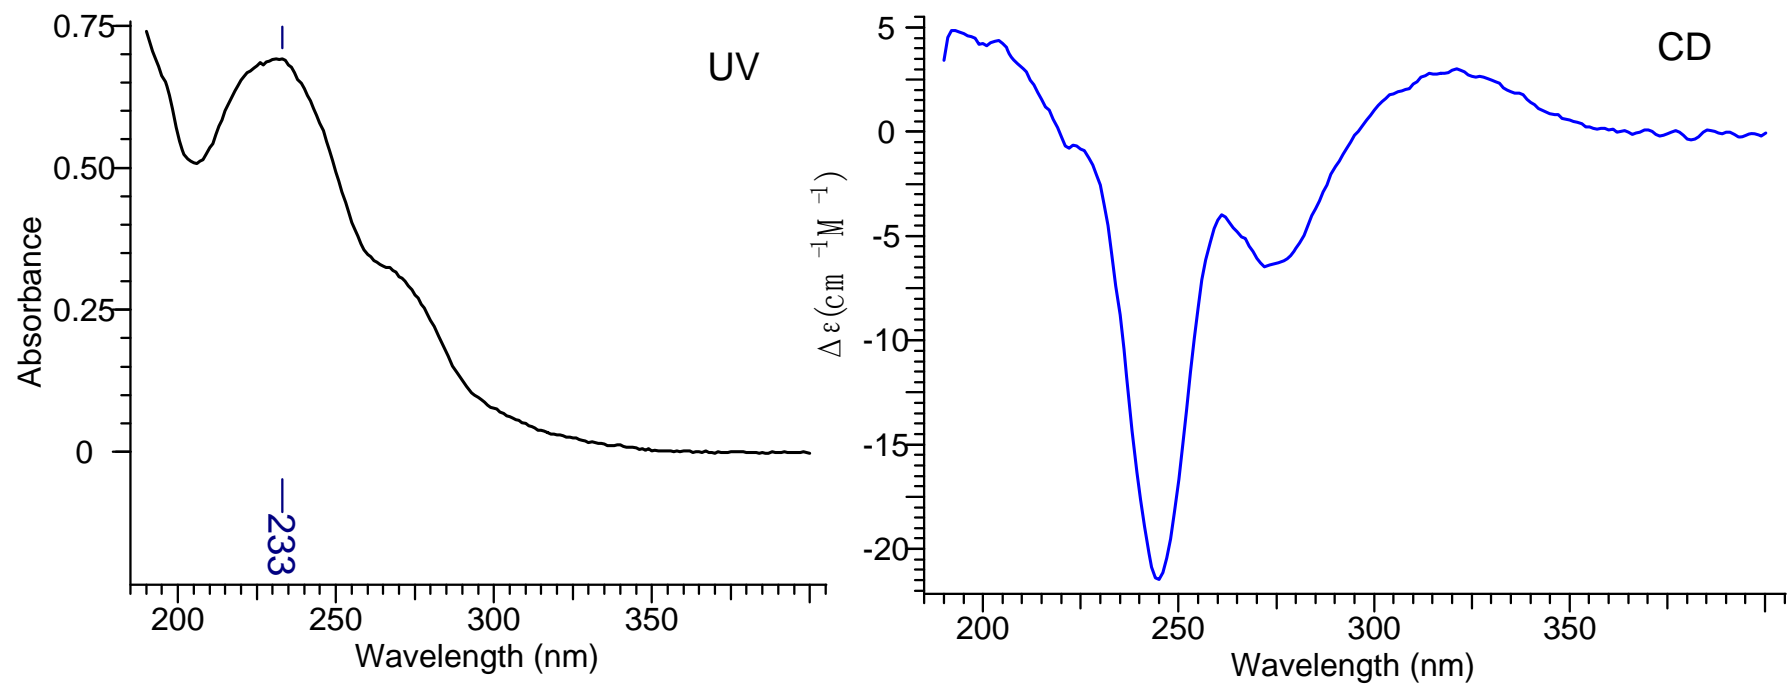

Figure S23.  $^1\text{H}$  NMR spectrum of 3 in  $\text{CDCl}_3$  (500 MHz)

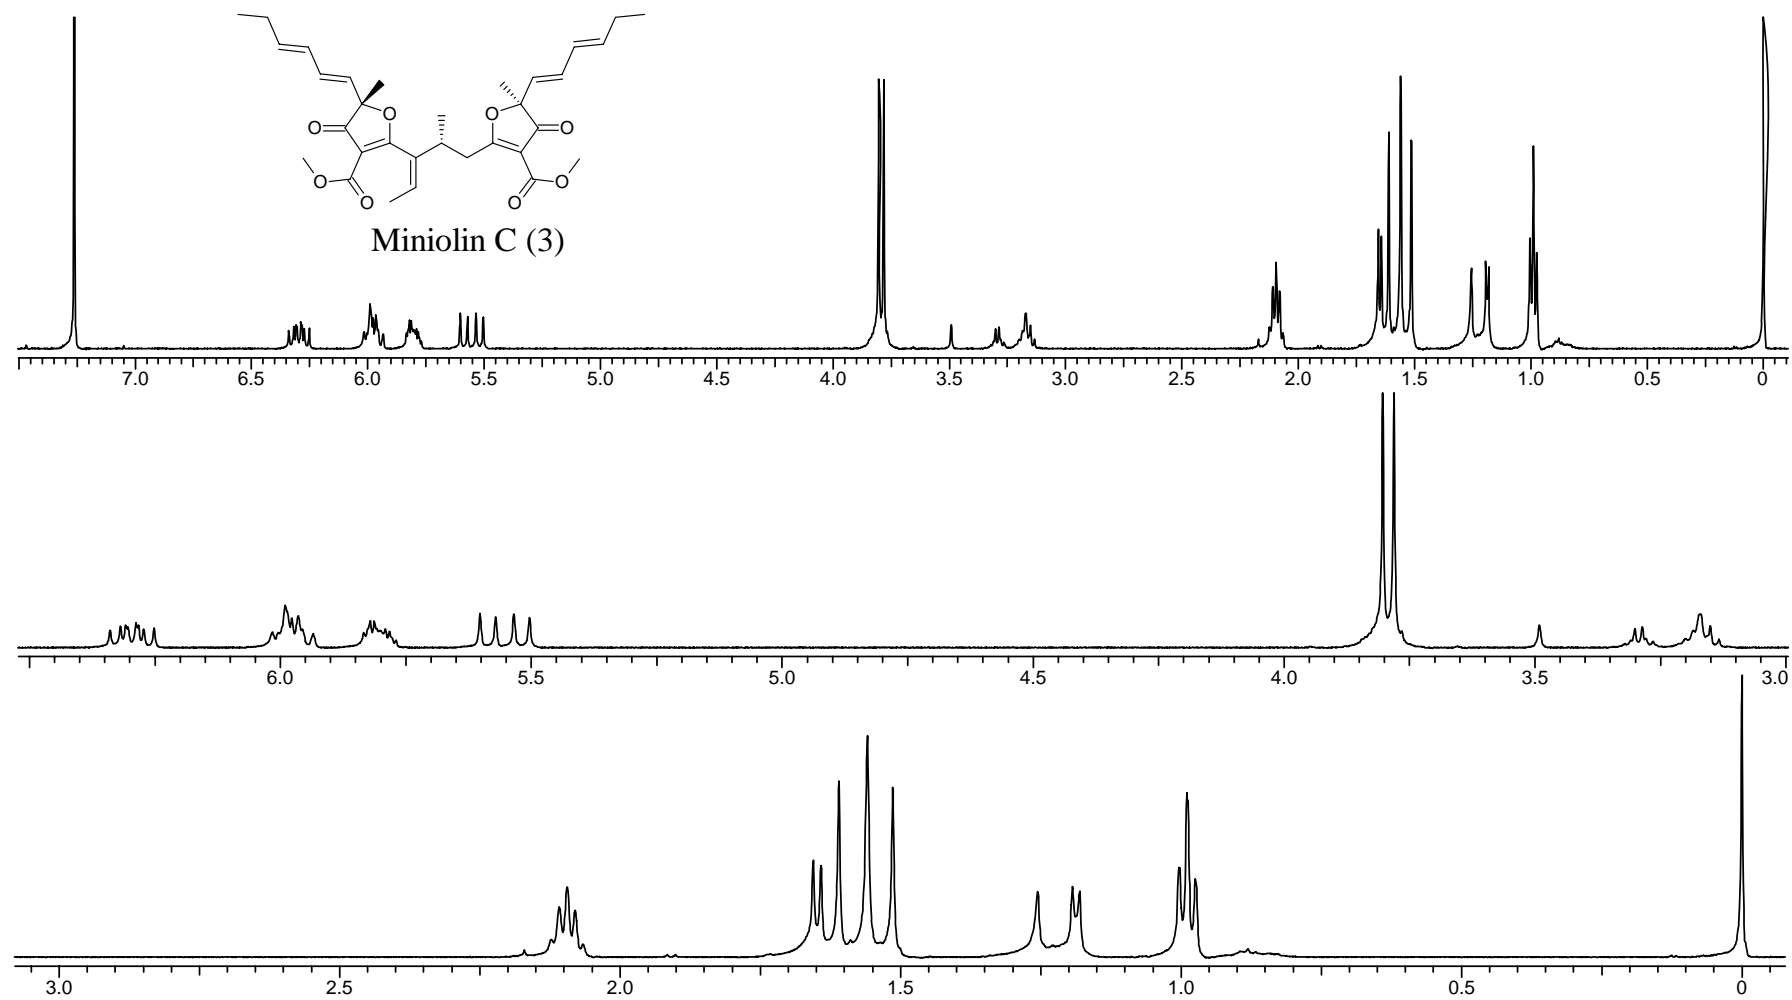

Figure S24.  $^{13}\text{C}$  NMR and DEPT spectrum of 3 in  $\text{CDCl}_3$  (125 MHz)

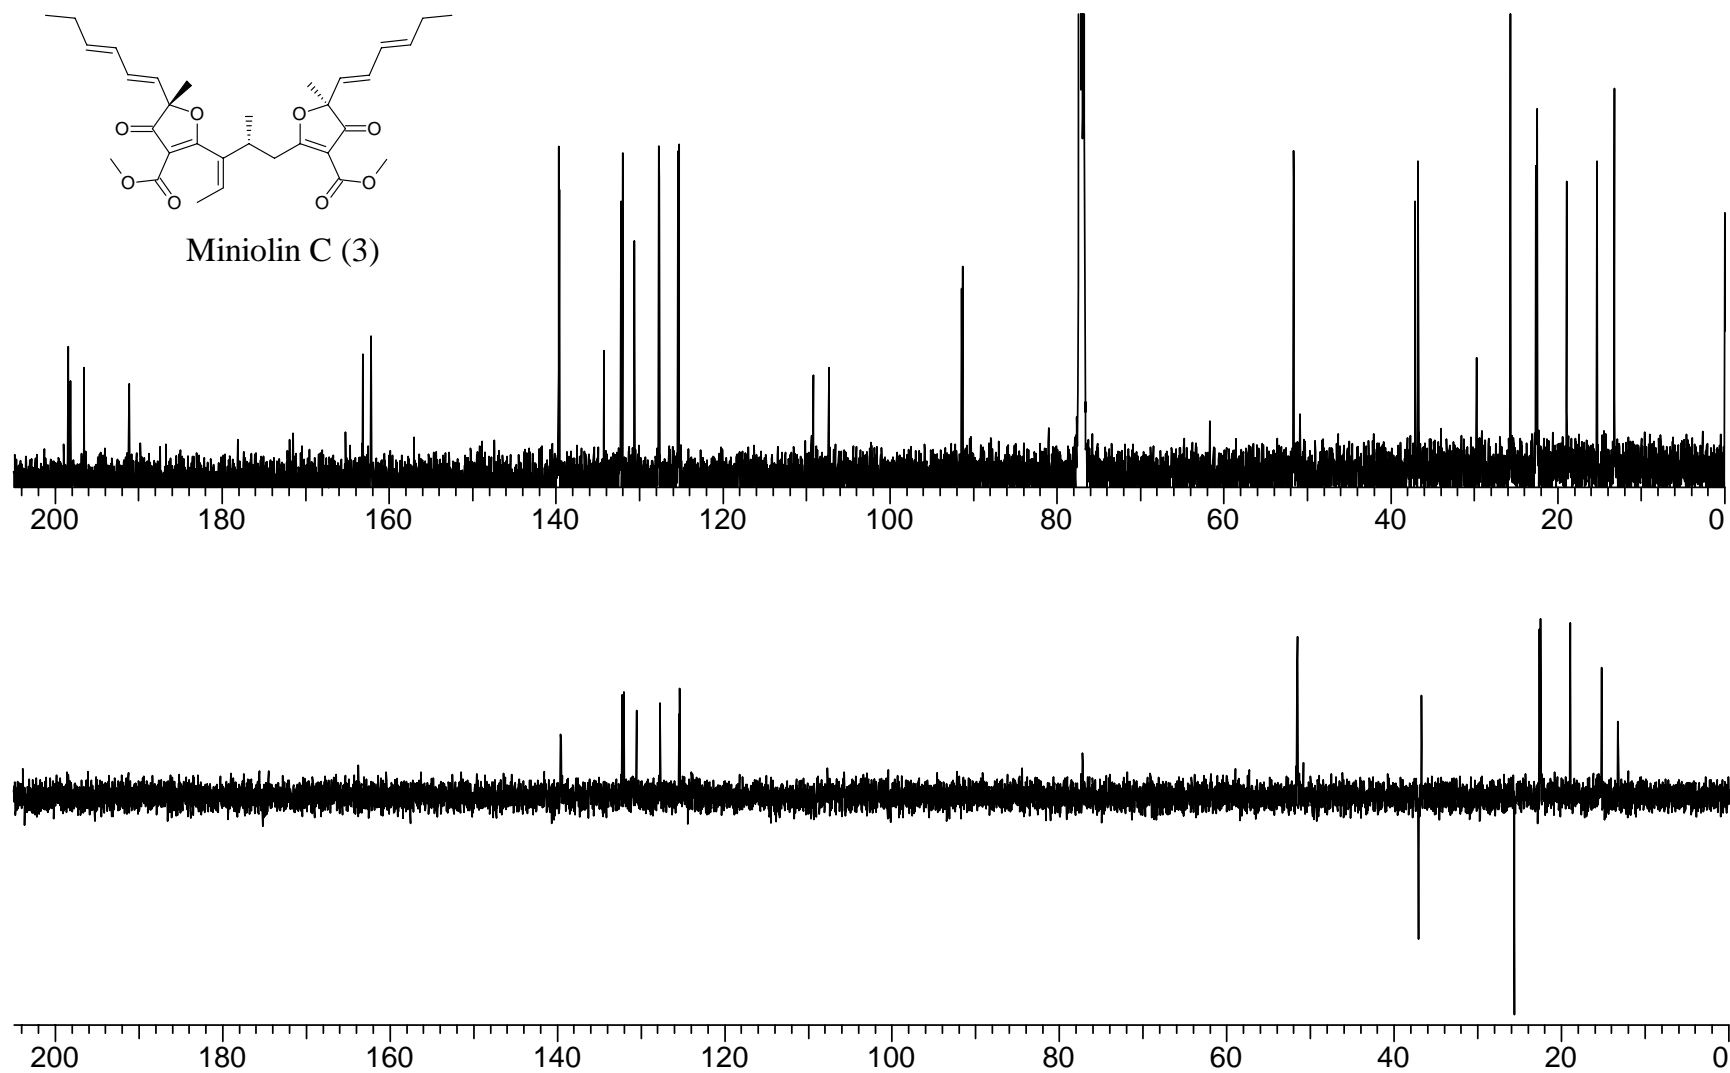

Figure S25. HSQC spectrum of 3

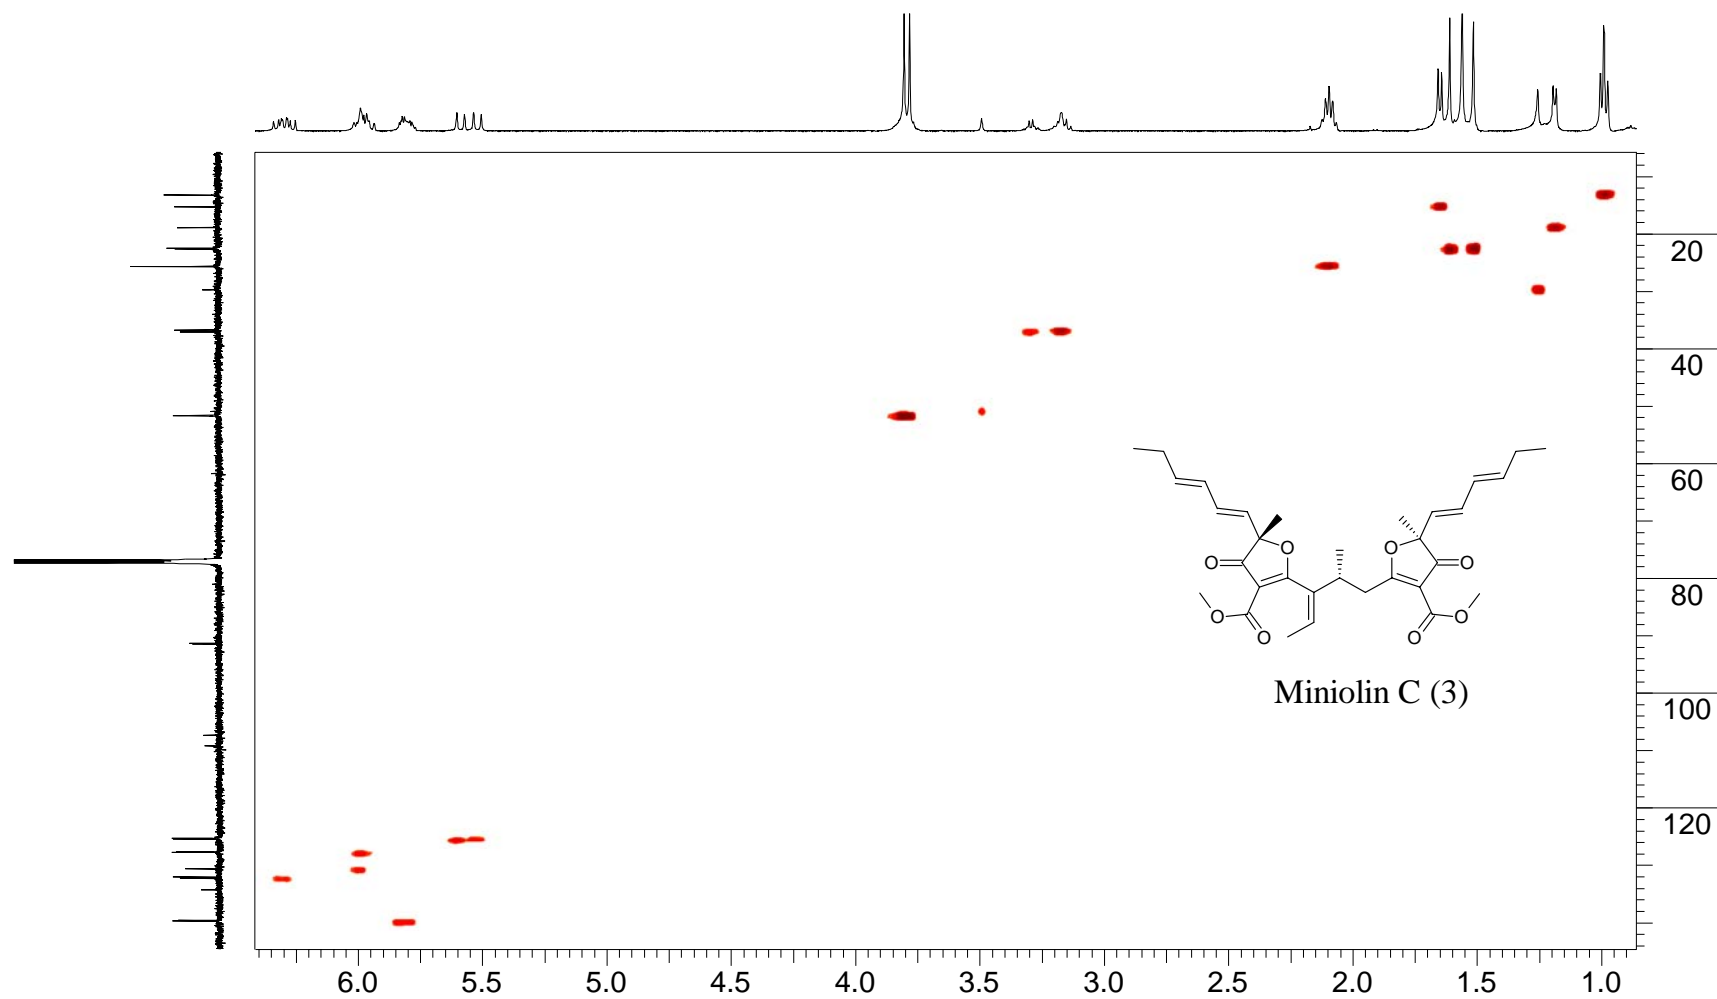

Figure S26.  $^1\text{H}$ - $^1\text{H}$  COSY spectrum of 3

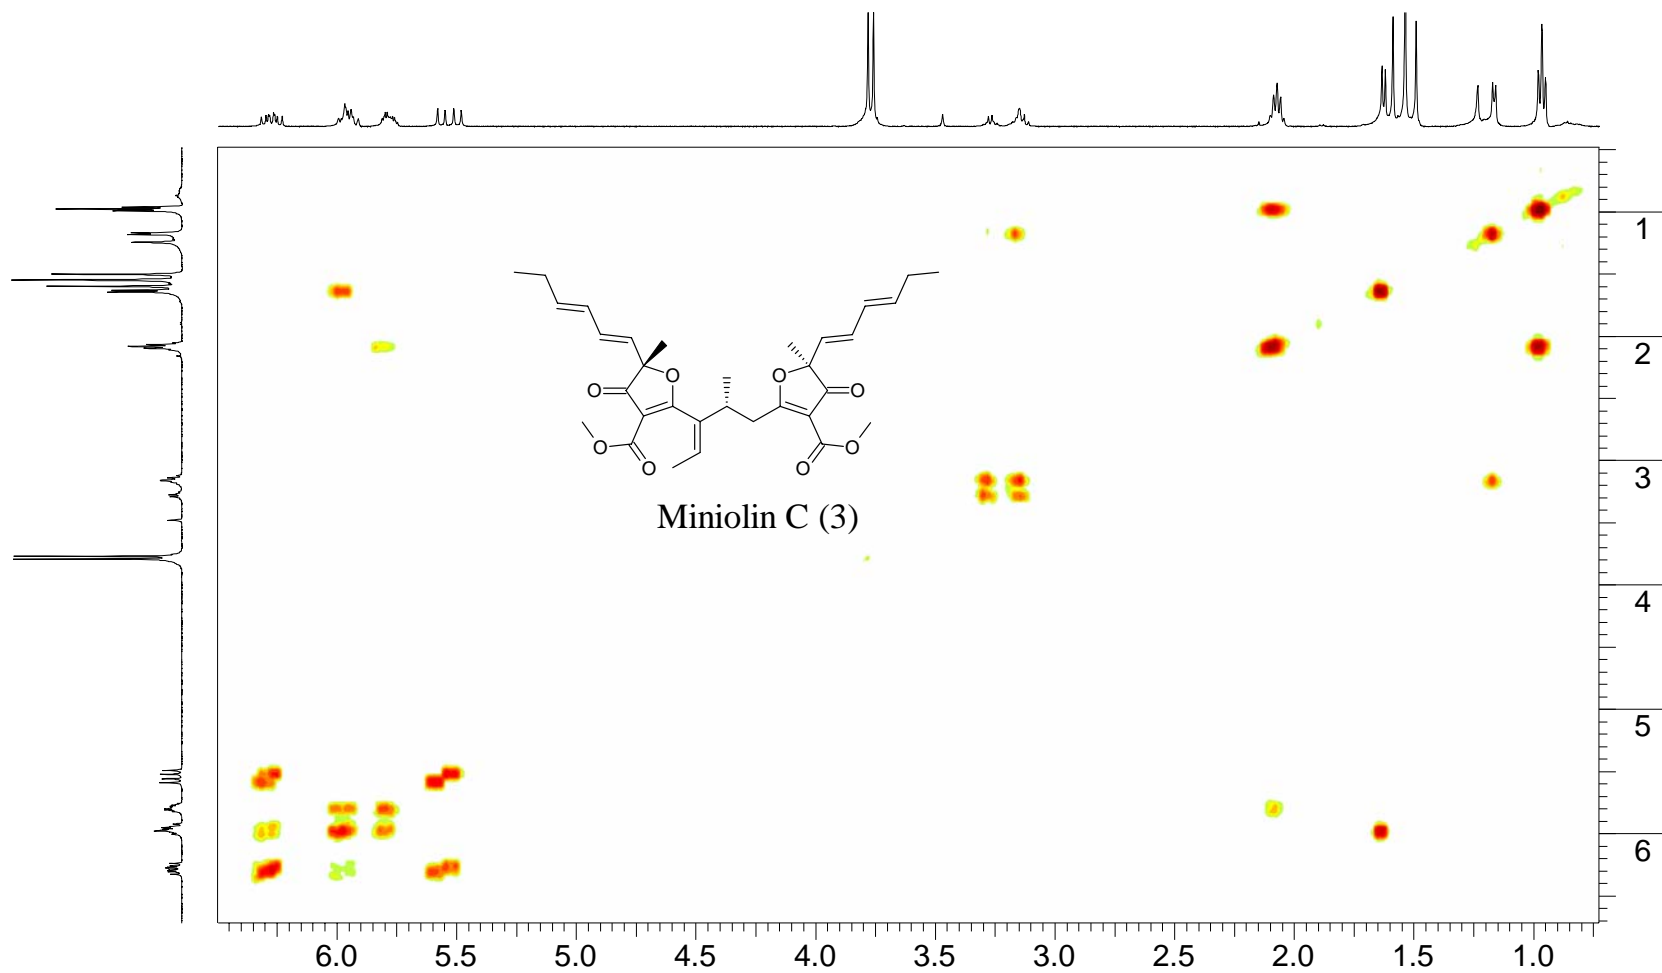



Figure S27. HMBC spectrum of 3

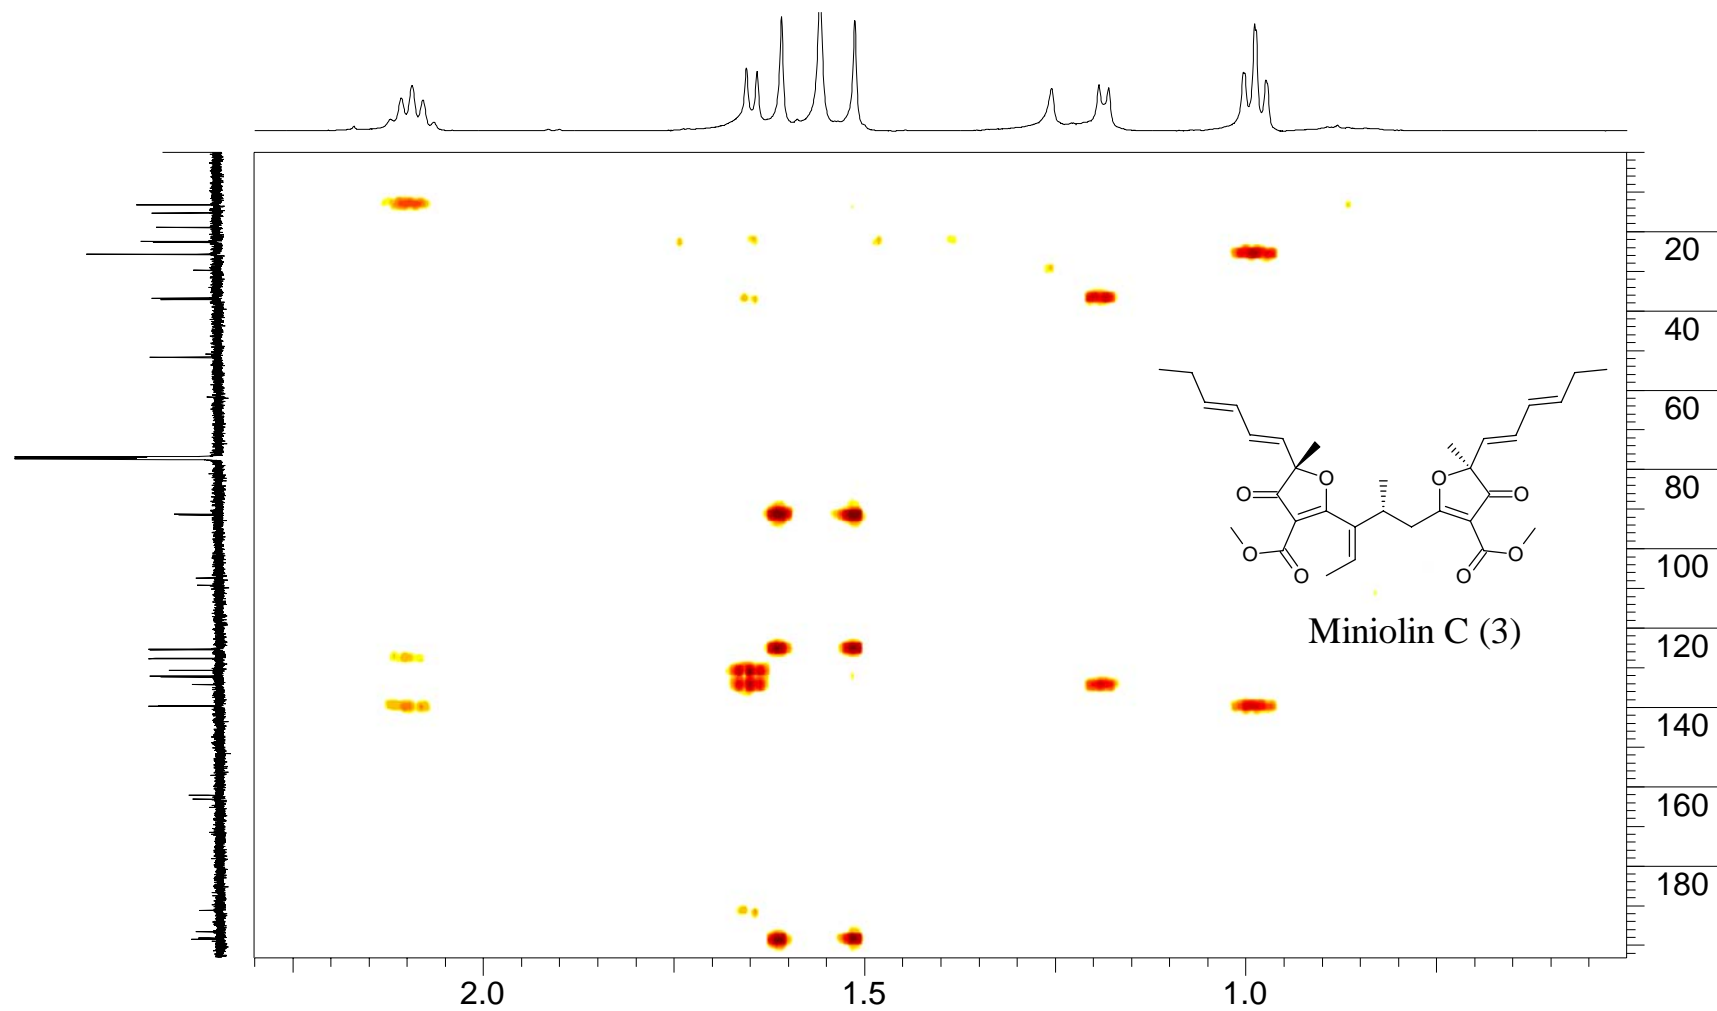

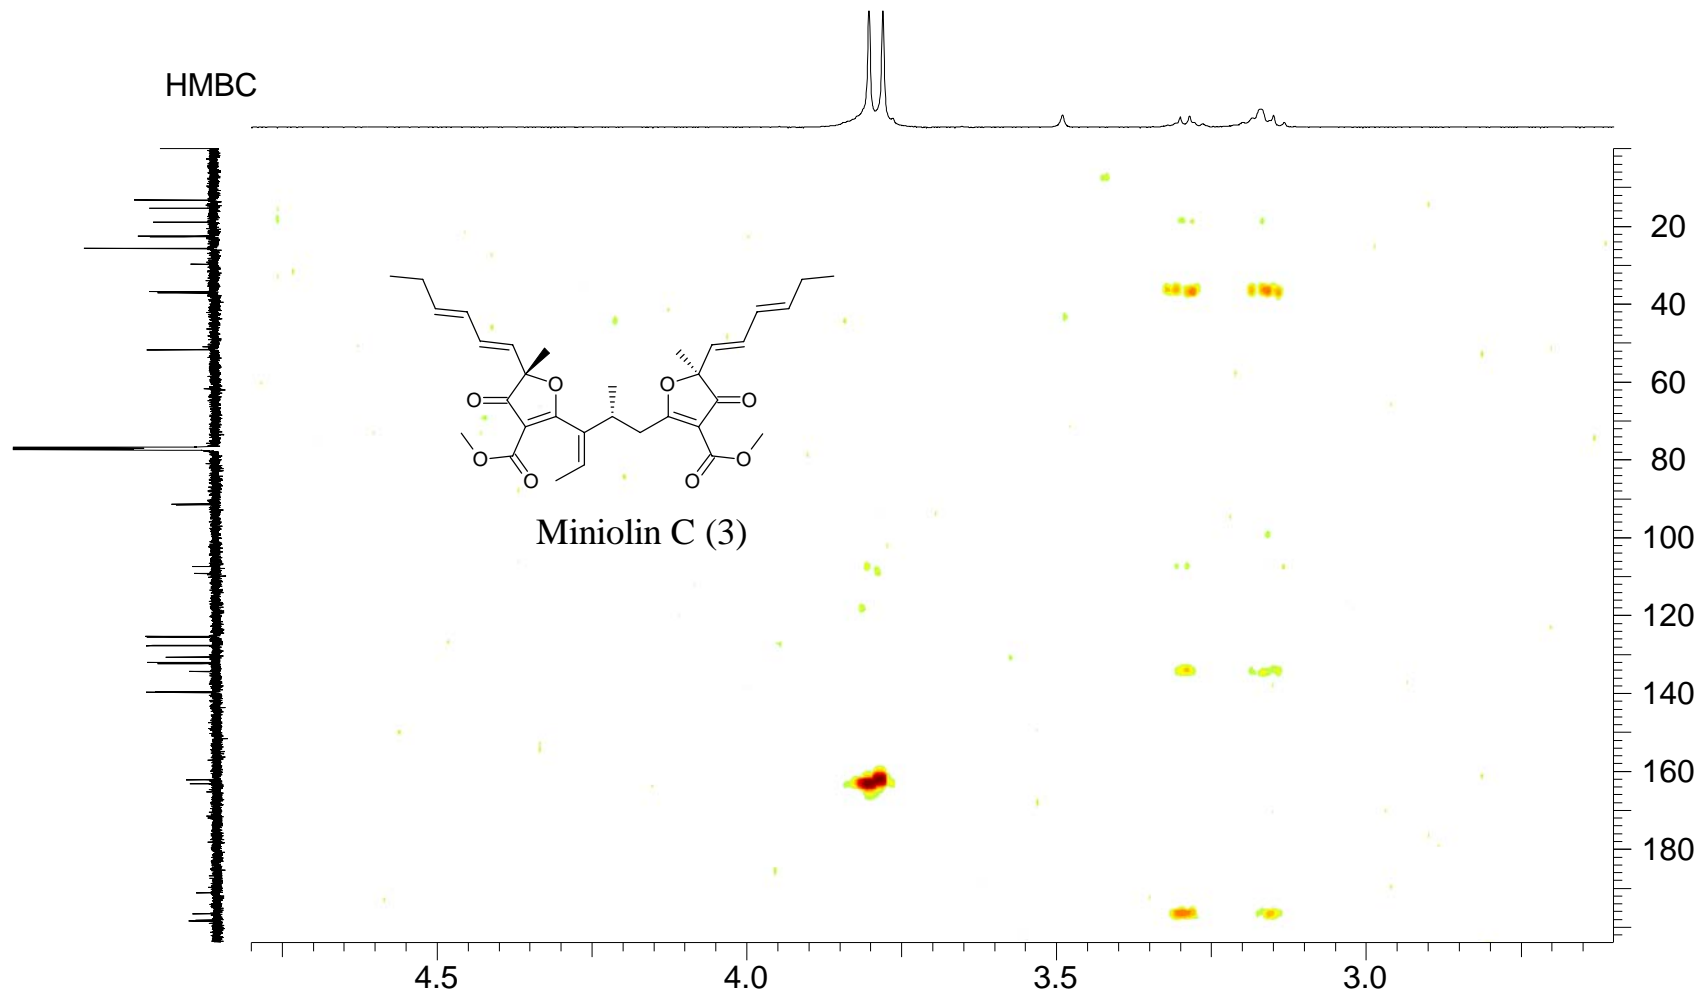

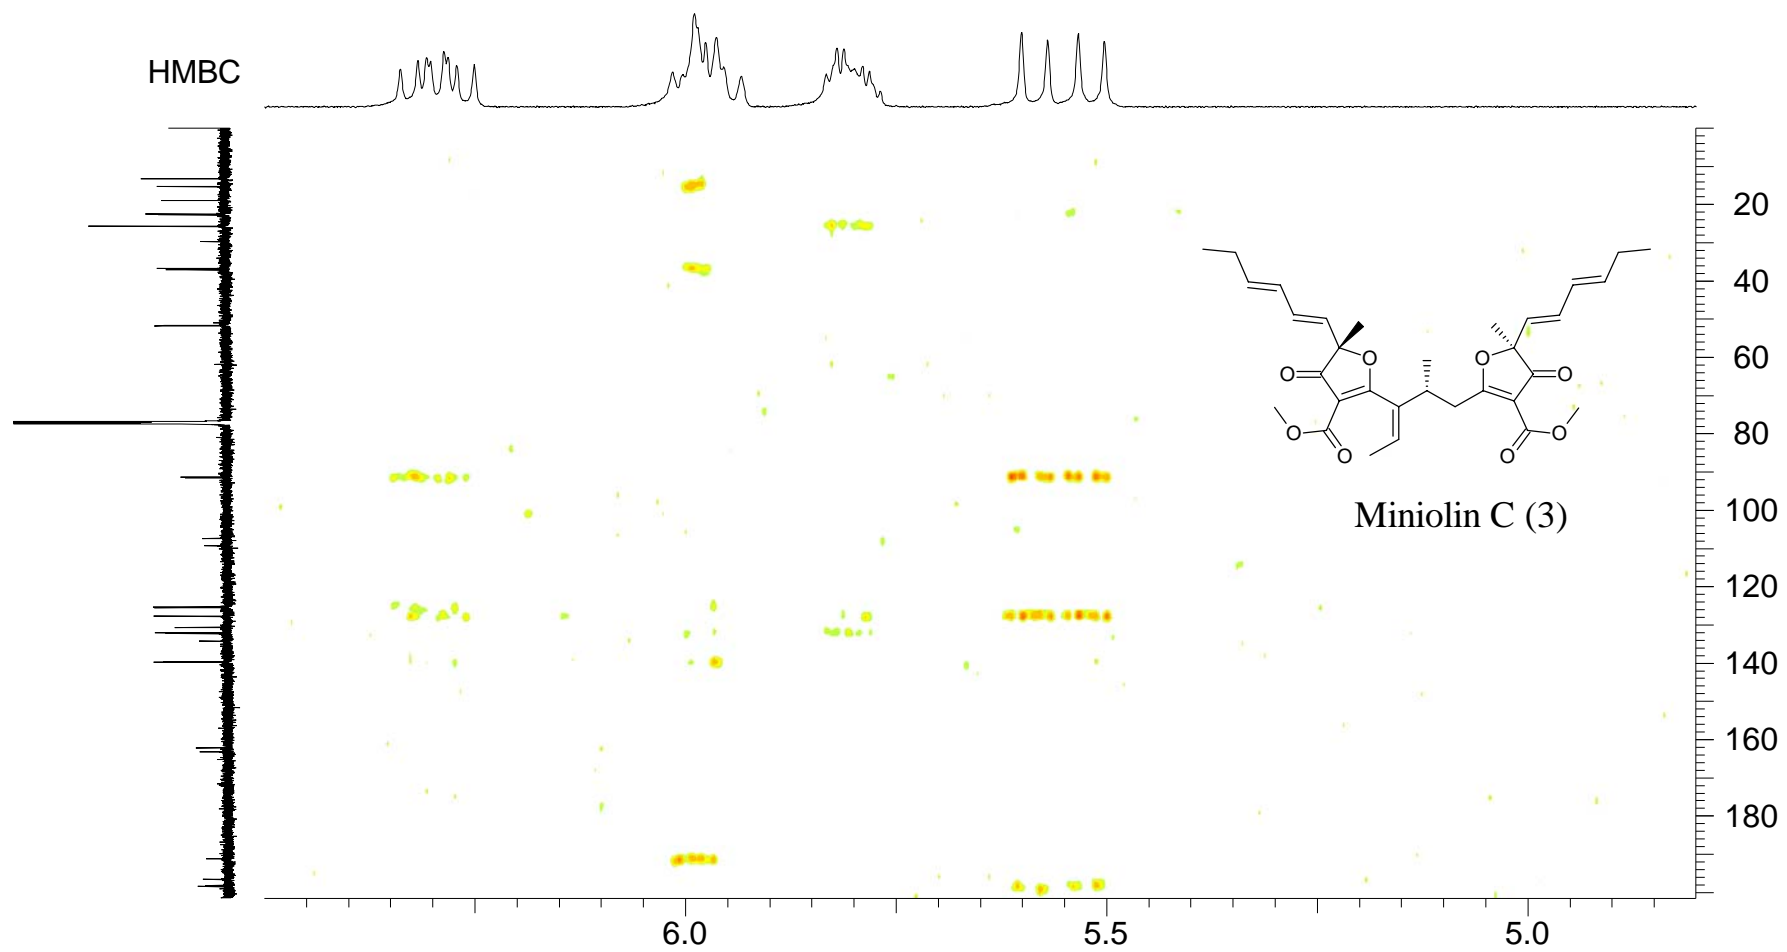

Figure S28. NOESY spectrum of 3

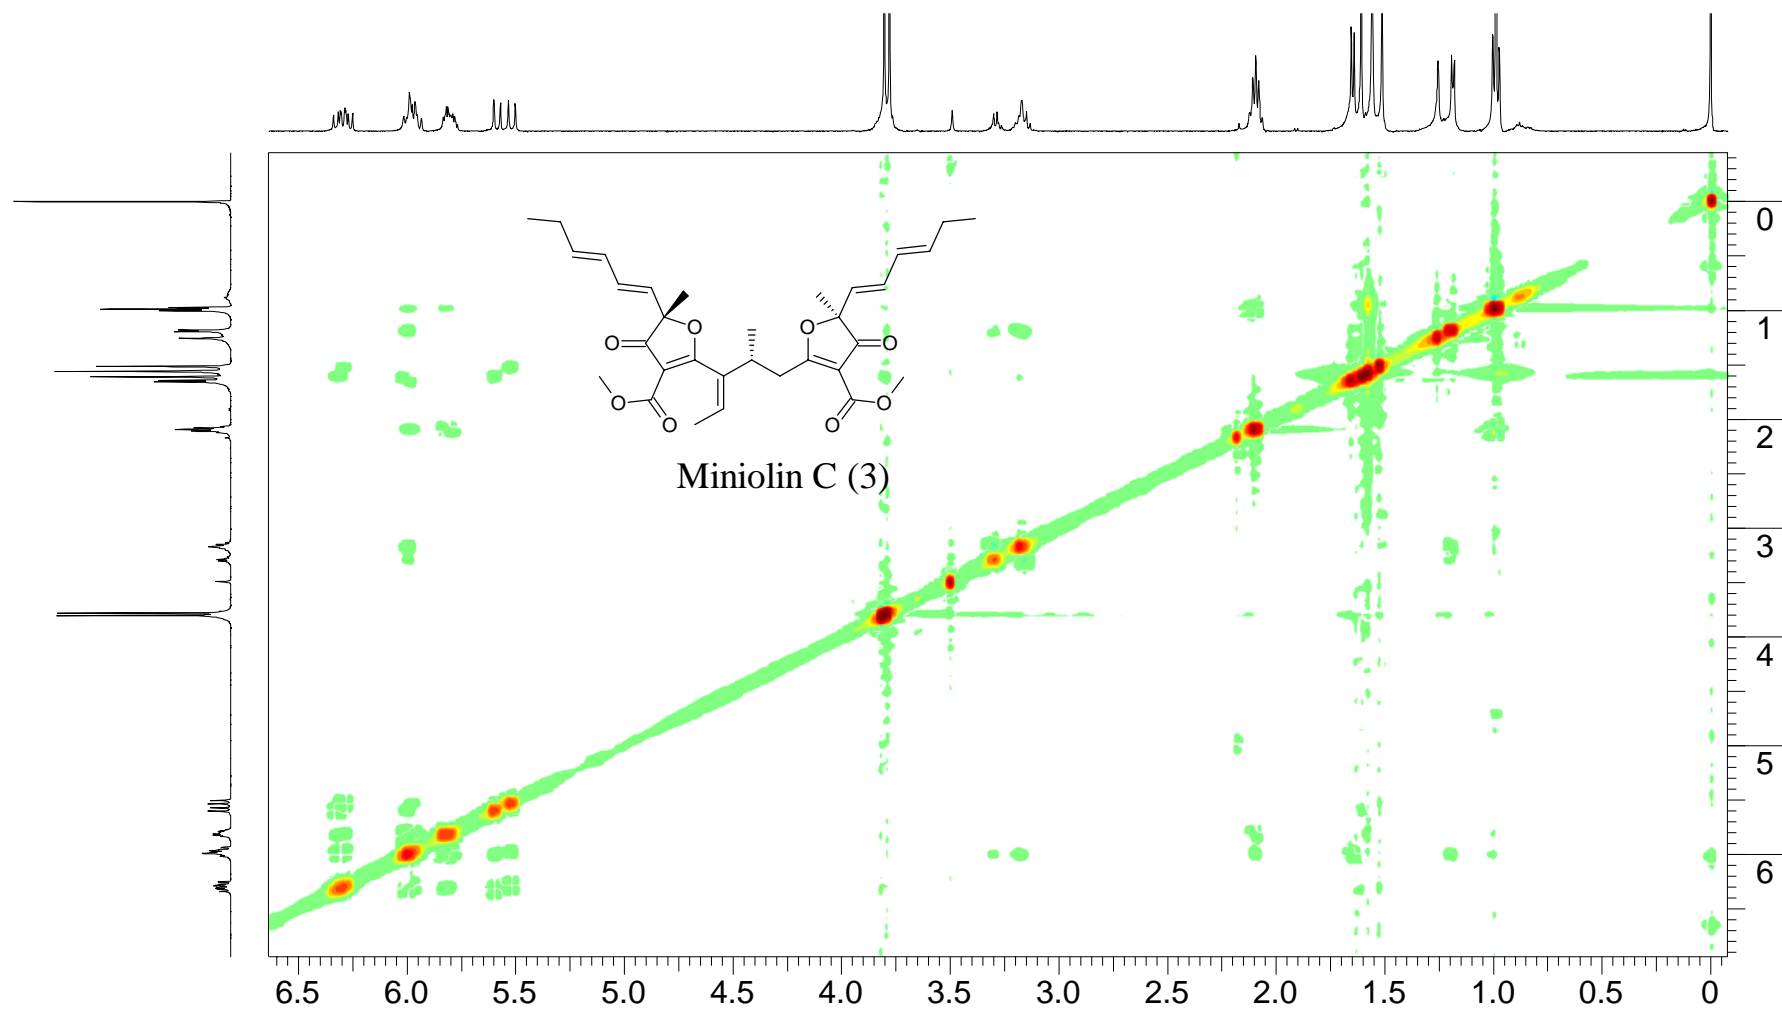

**Figure S29. Positive ESIMS spectrum of 3**

ZH28 #9-13 RT: 0.03-0.05 AV: 5 NL: 1.21E4  
T: ITMS + c ESI sid=35.00 Full ms [50.00-2000.00]

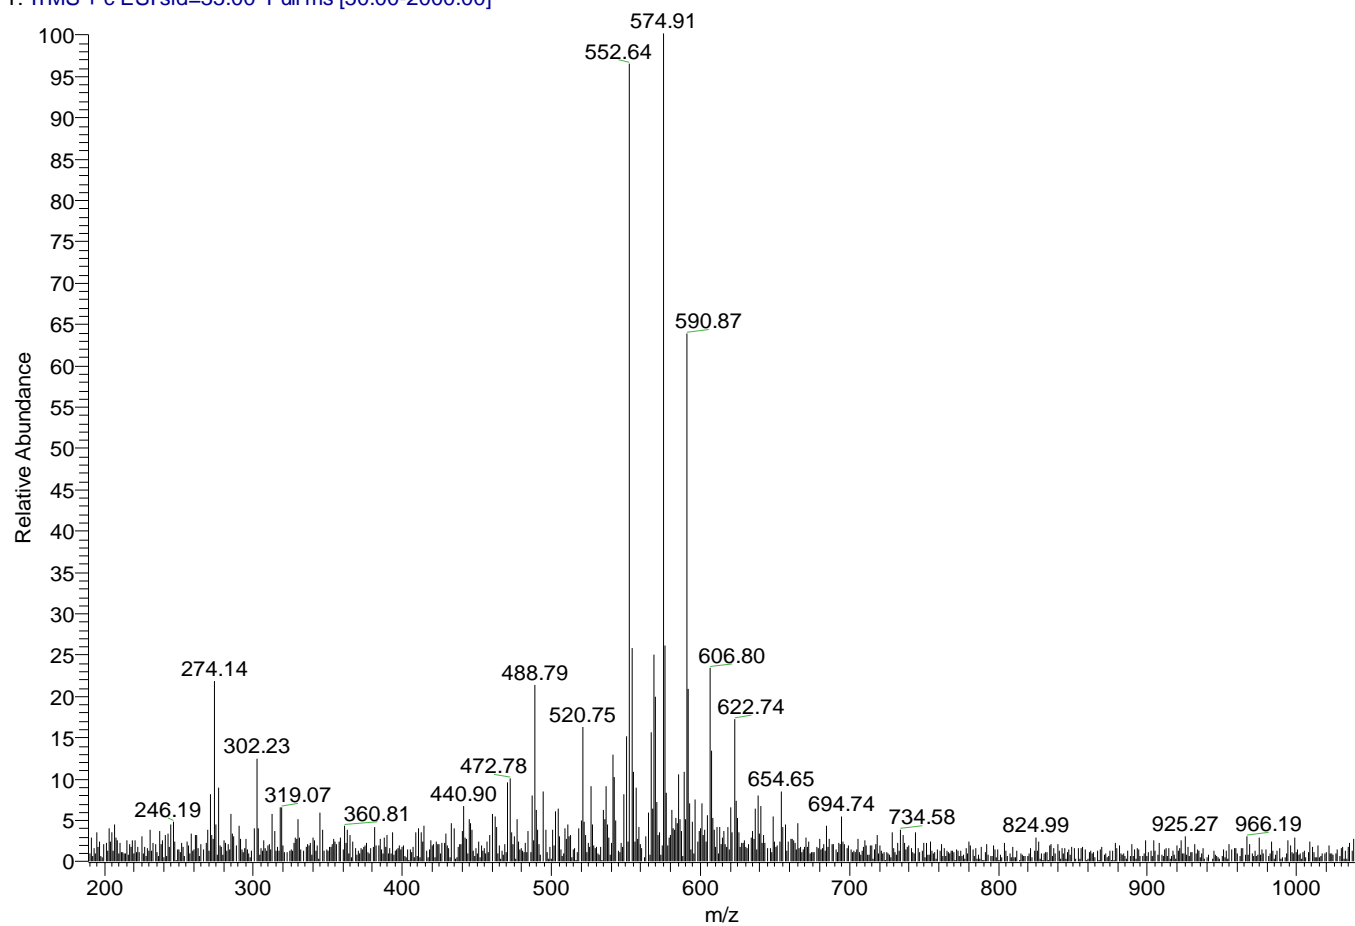

**Figure S30. HR ESIMS spectrum of 3**

Measured region for 553.2810 m/z

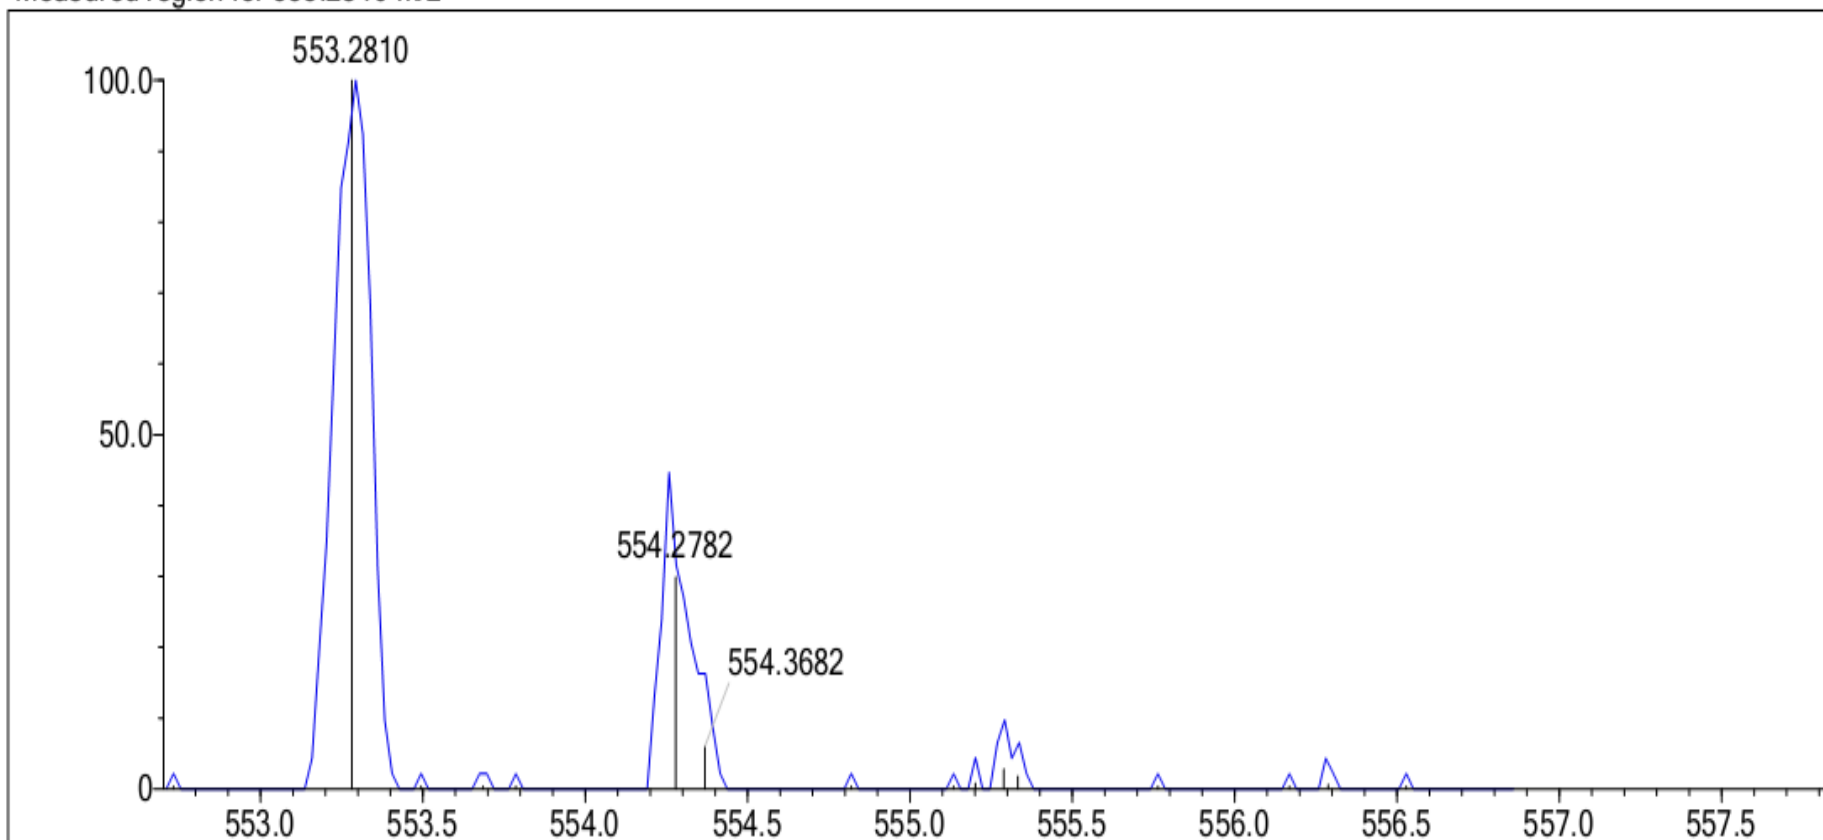

| Rank | Score | Ion                | Formula (M)                                    | Pred. m/z | Meas. m/z | Df. (mDa) | Df. (ppm) | Iso   | DBE  |
|------|-------|--------------------|------------------------------------------------|-----------|-----------|-----------|-----------|-------|------|
| 1    | 57.74 | [M+H] <sup>+</sup> | C <sub>32</sub> H <sub>40</sub> O <sub>8</sub> | 553.2796  | 553.2810  | 1.4       | 2.53      | 60.03 | 13.0 |

Figure S31. IR spectrum of 3

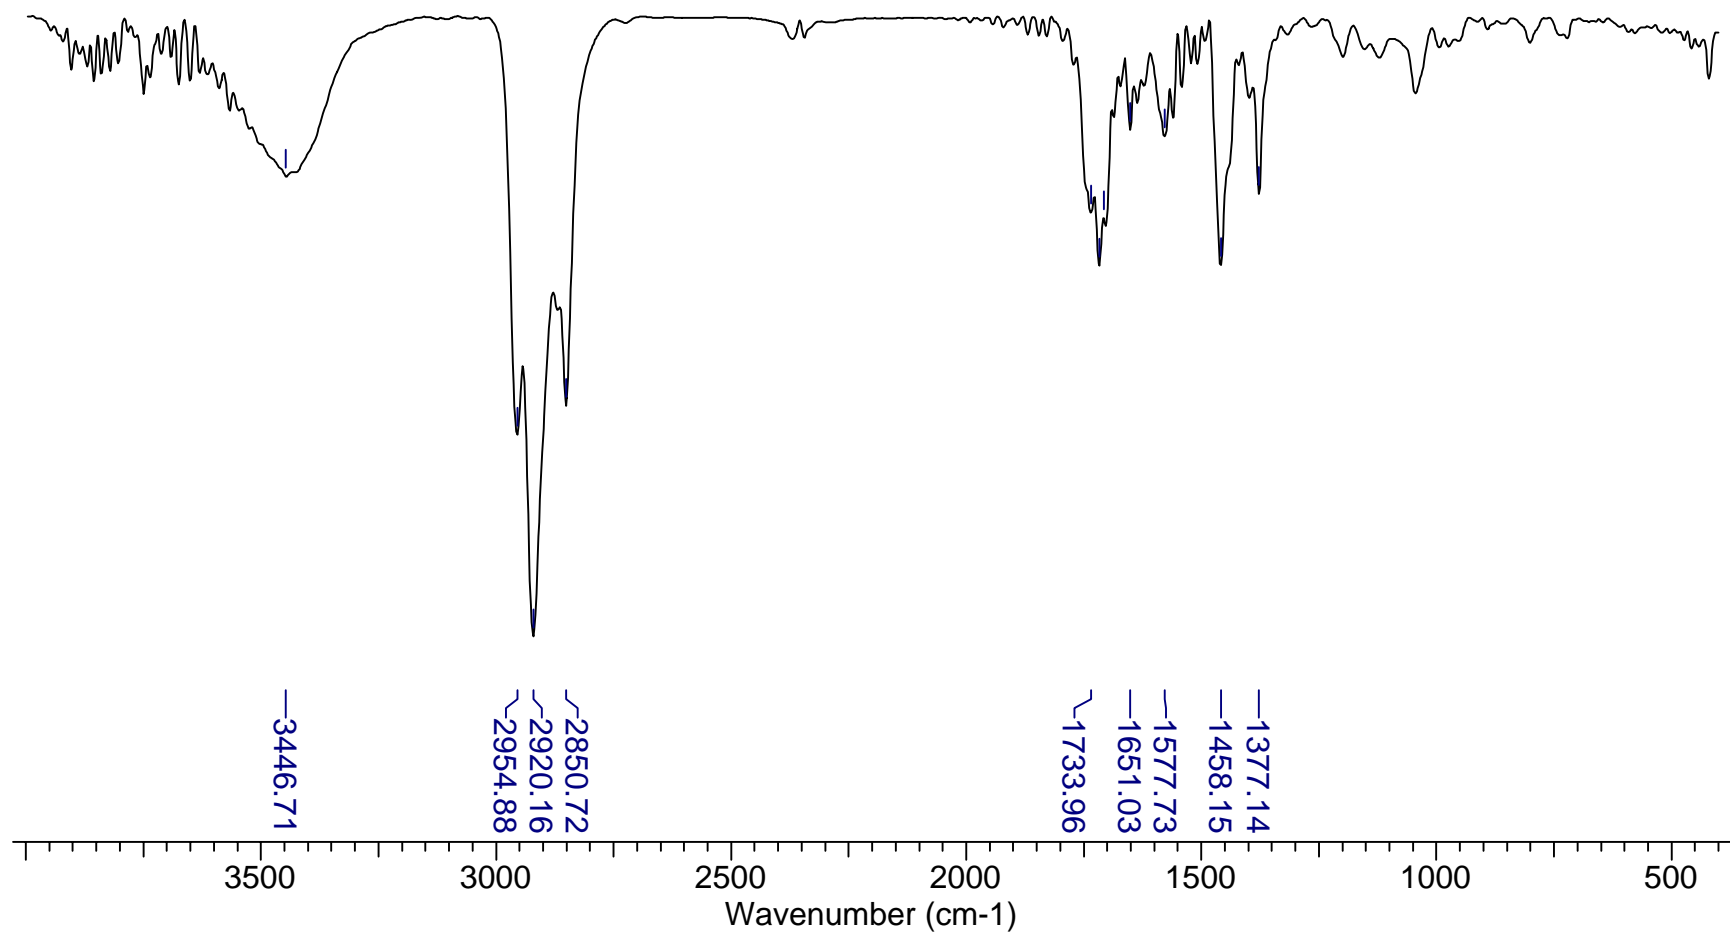

**Figure S32. UV and CD spectra of 3**

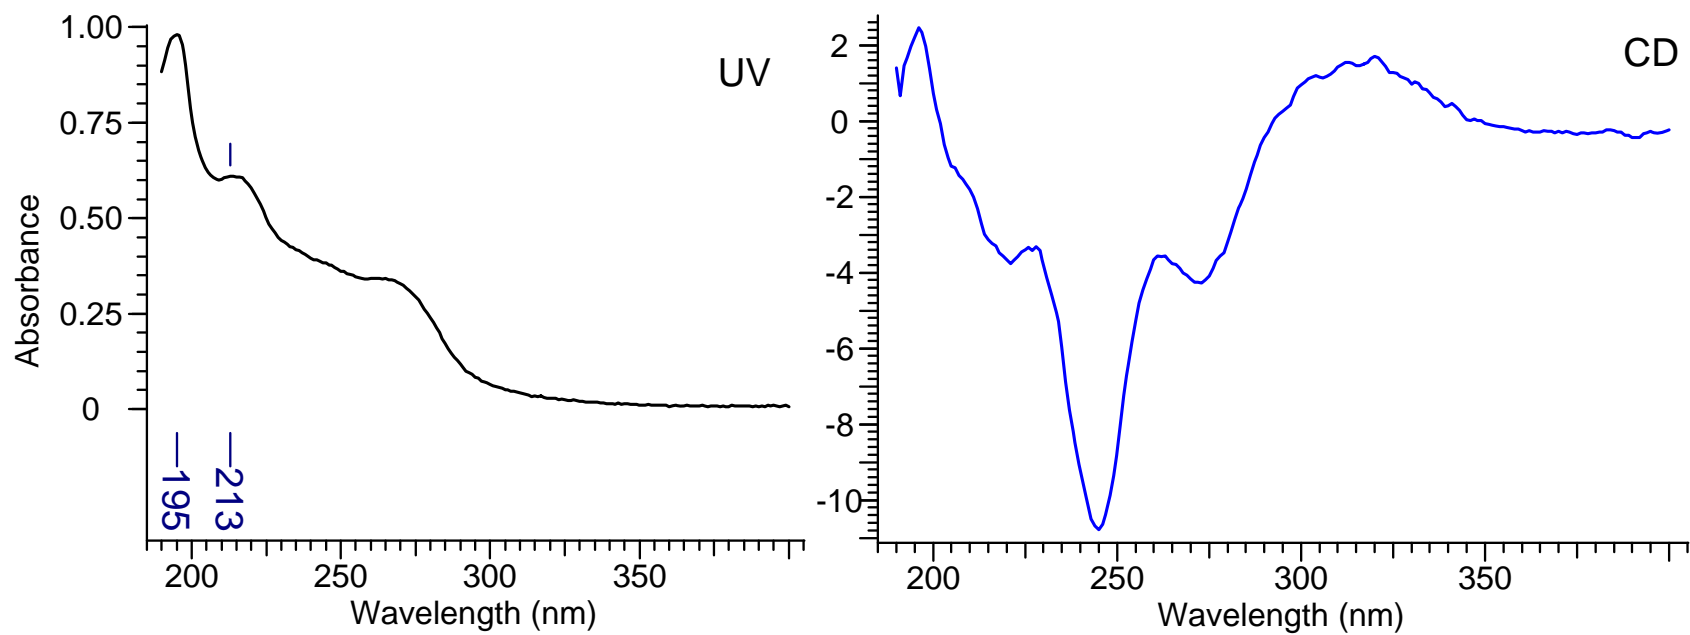



Figure S33.  $^1\text{H}$  NMR spectrum of 4 in  $\text{CDCl}_3$  (400 MHz)

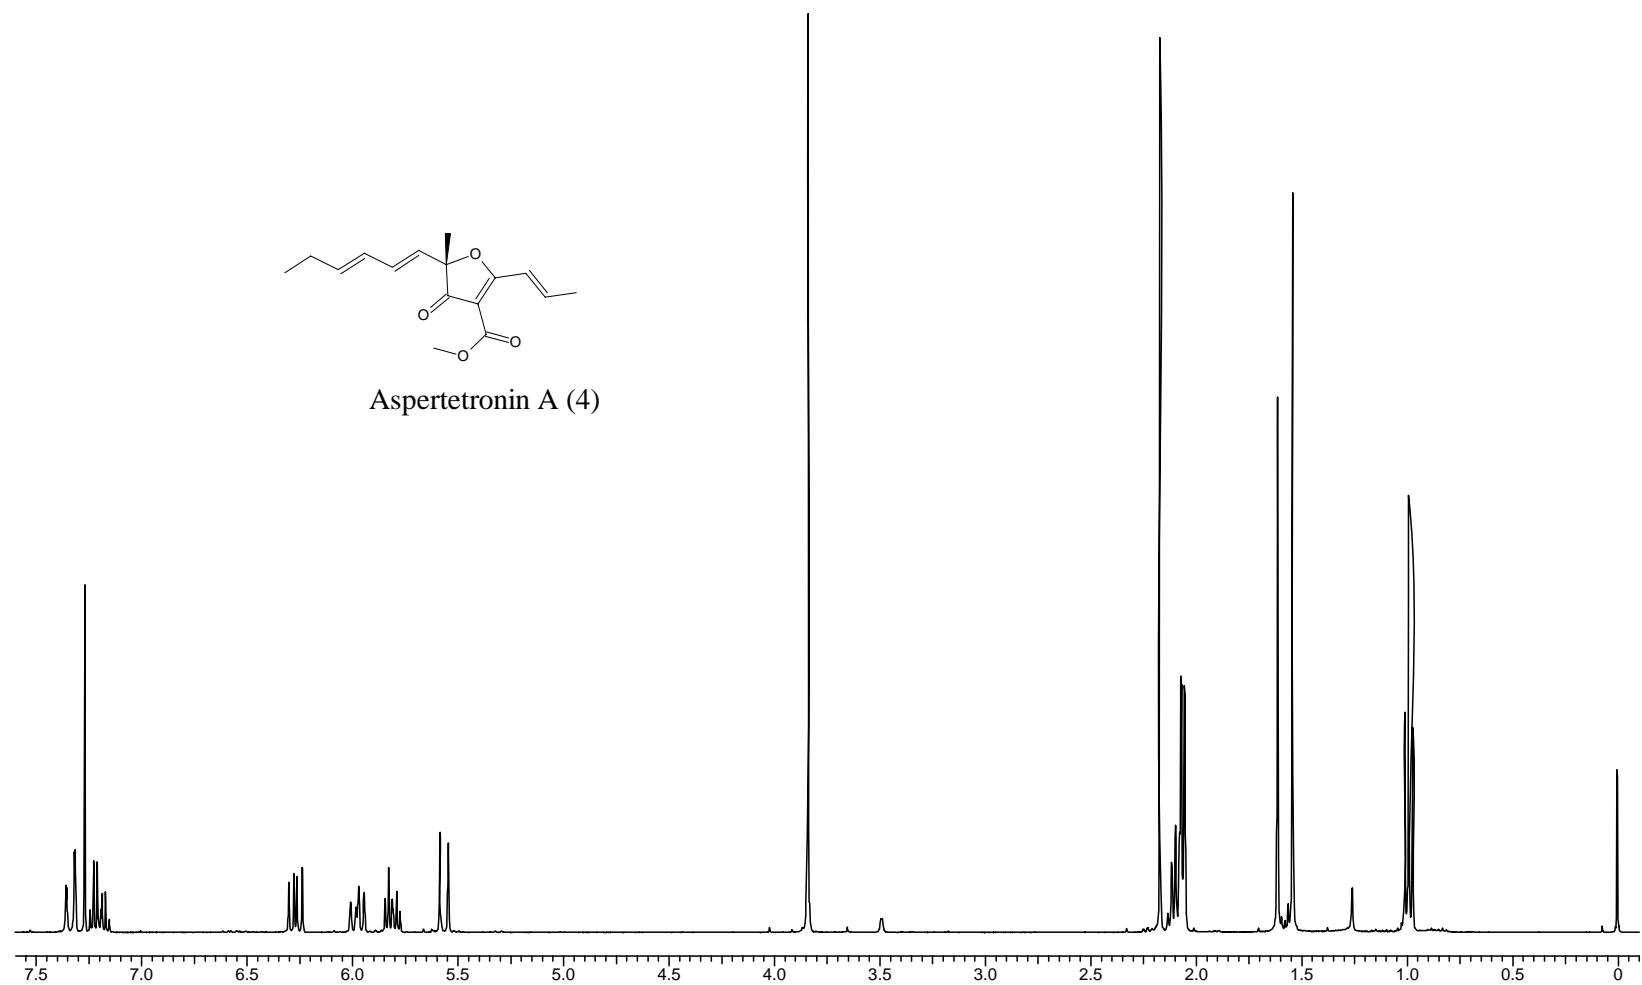

Figure S34.  $^{13}\text{C}$  NMR spectrum of **4** in  $\text{CDCl}_3$  (100 MHz)

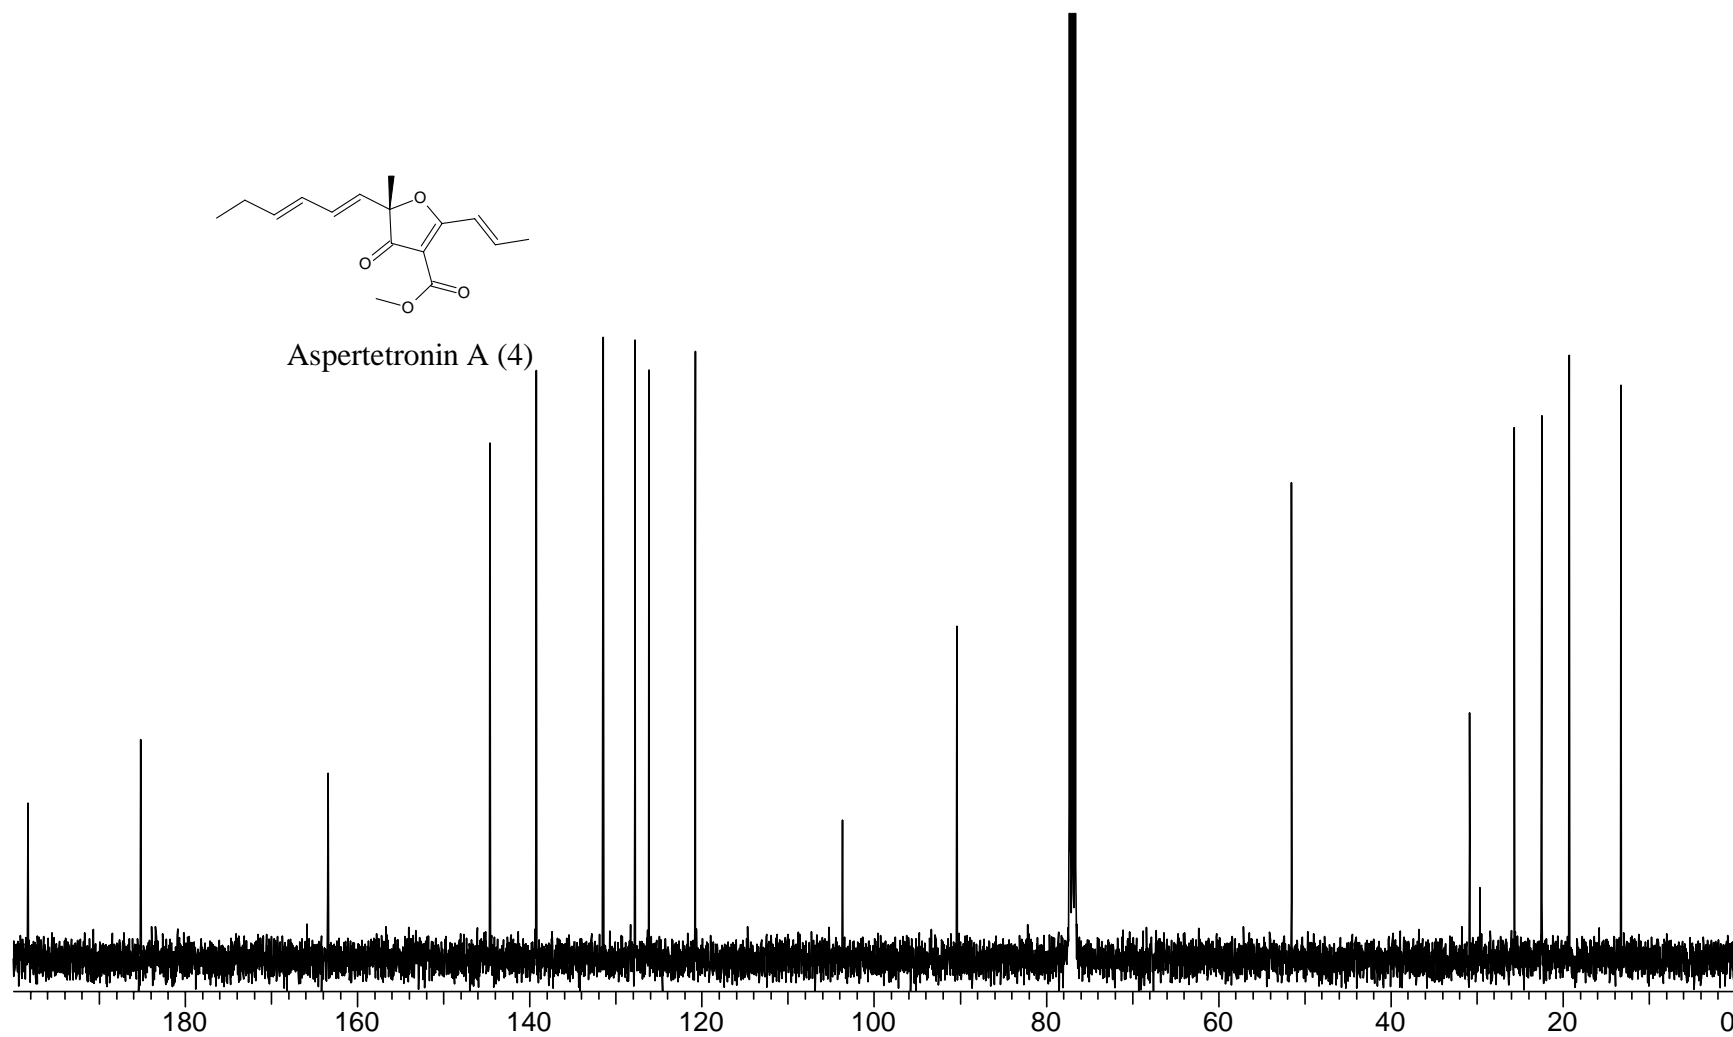

Figure S35. IR spectrum of 4

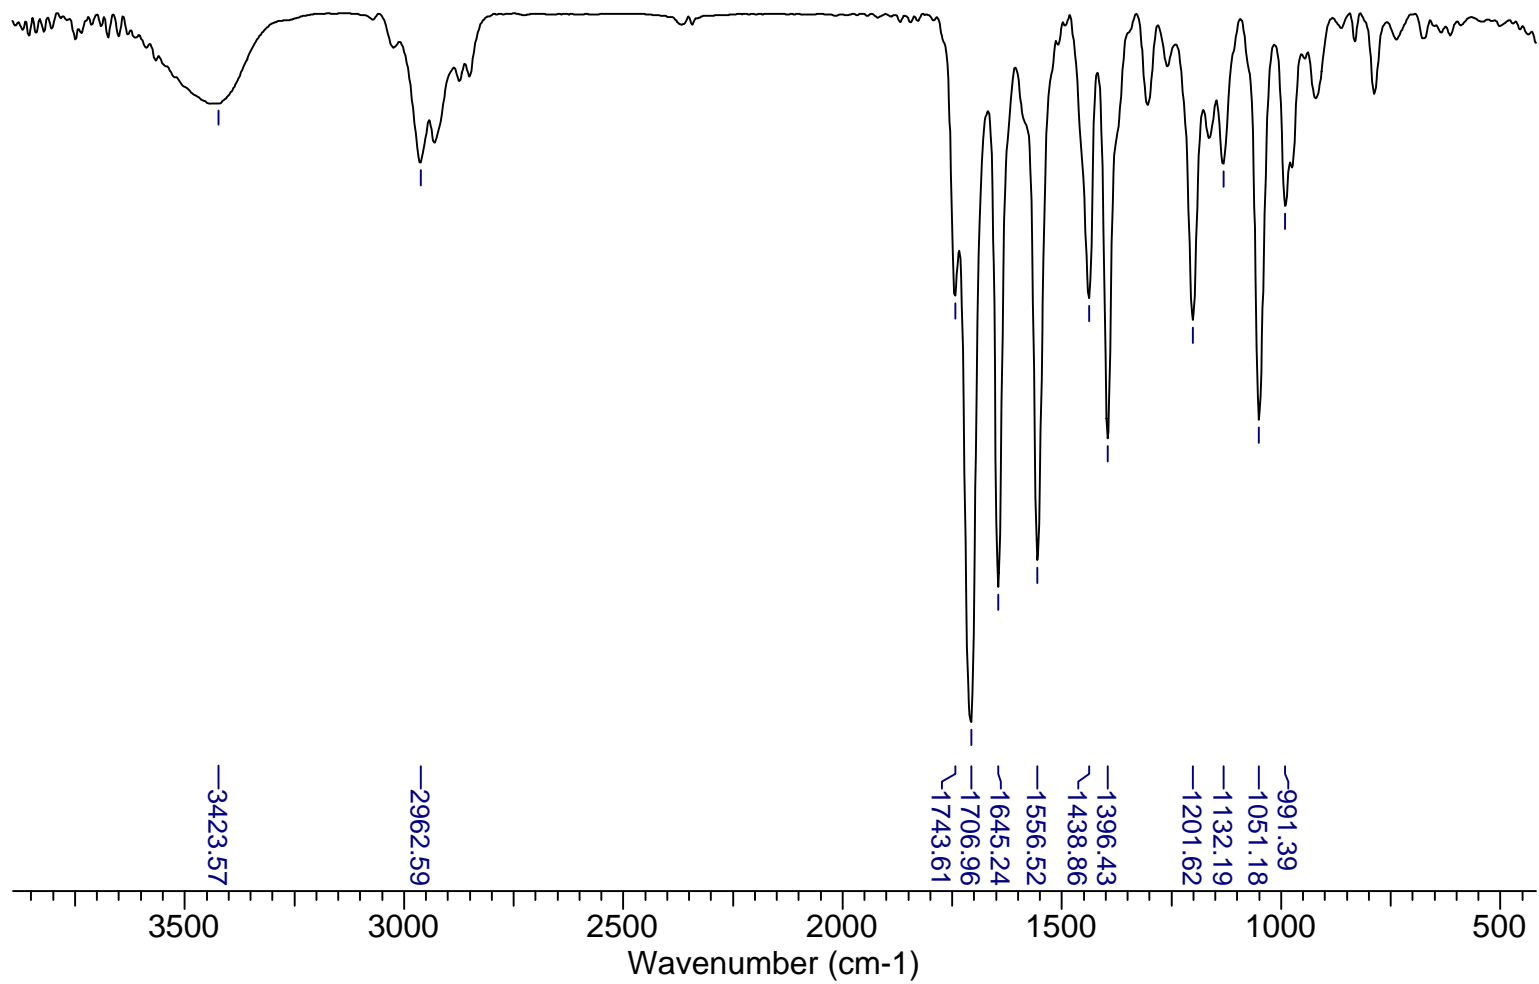

**Figure S36. UV spectrum of 4**

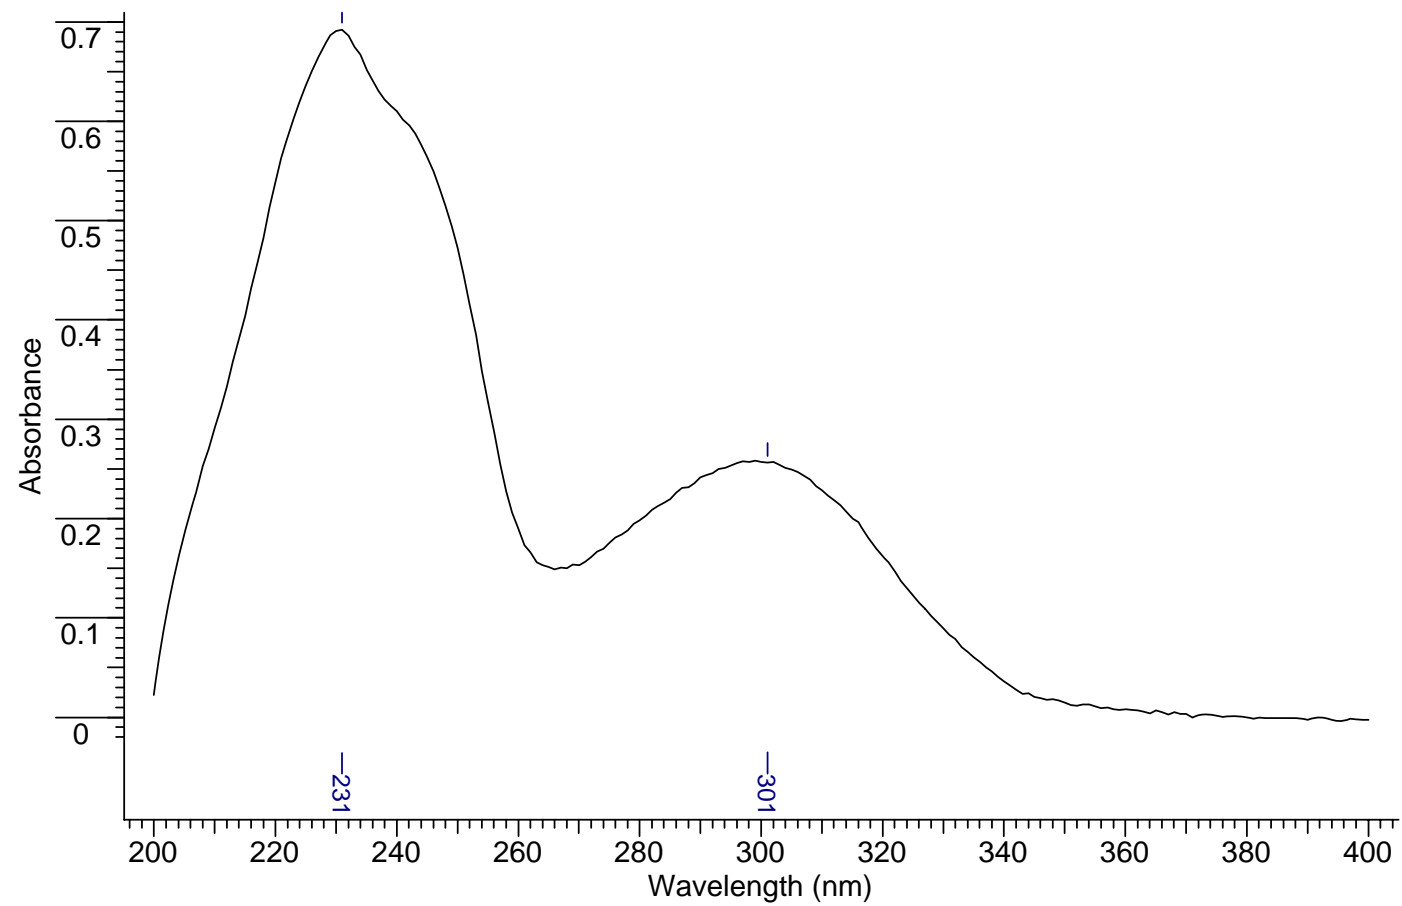

# Figure S37. ESIMS of 4

Gao Jining ZH-2 #27-31 RT: 0.07-0.08 AV: 5 NL: 3.71E5  
T: ITMS + c ESI Full ms [80.00-1000.00]

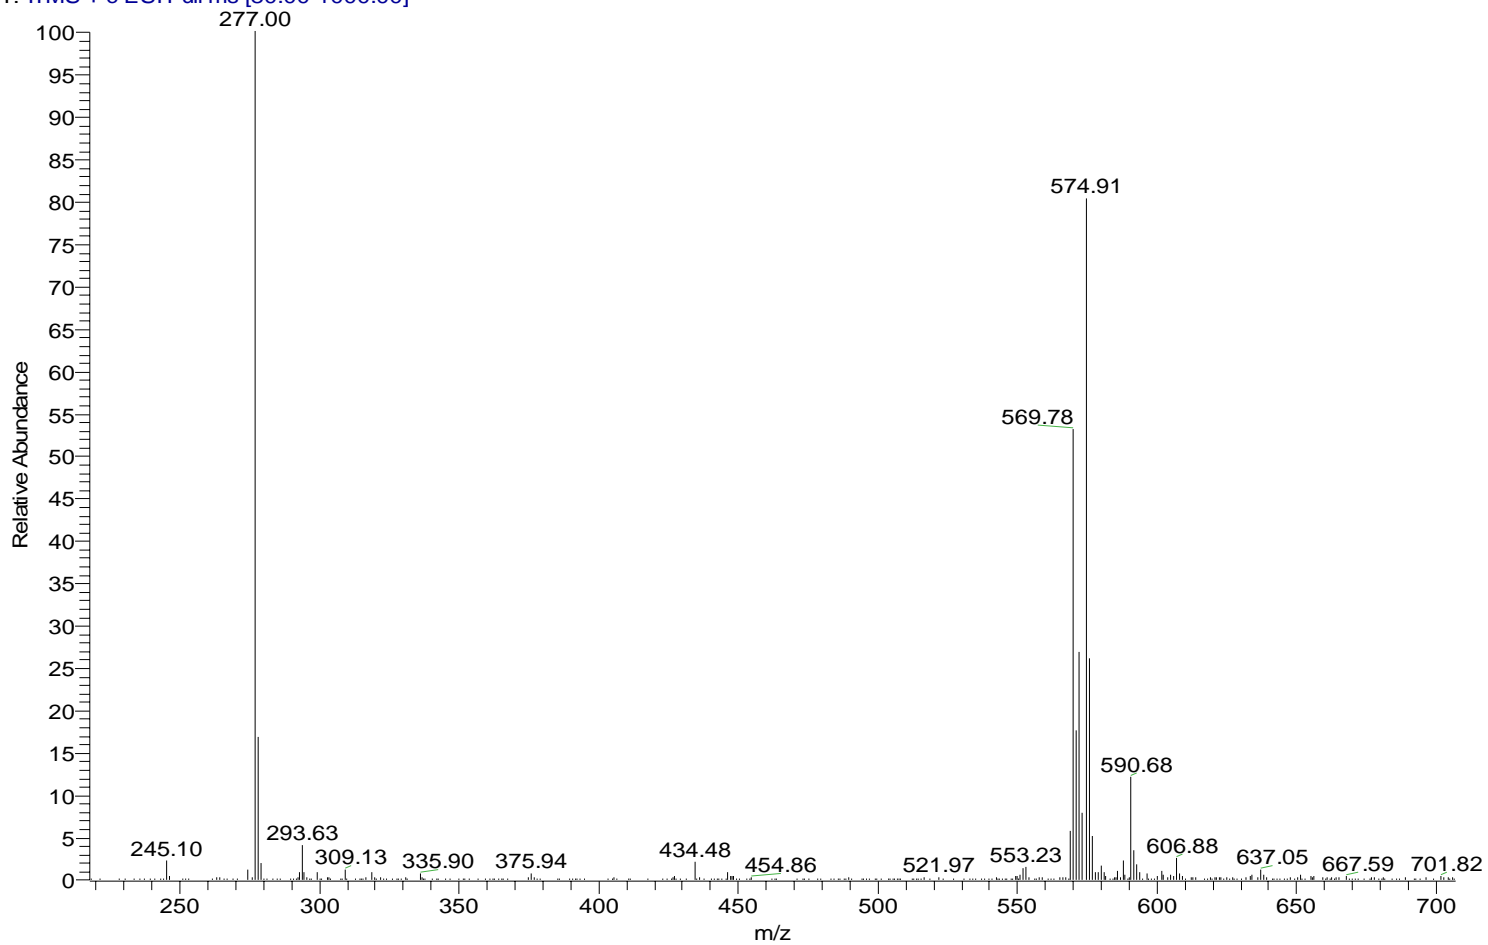

**Figure S38. CD of 4**

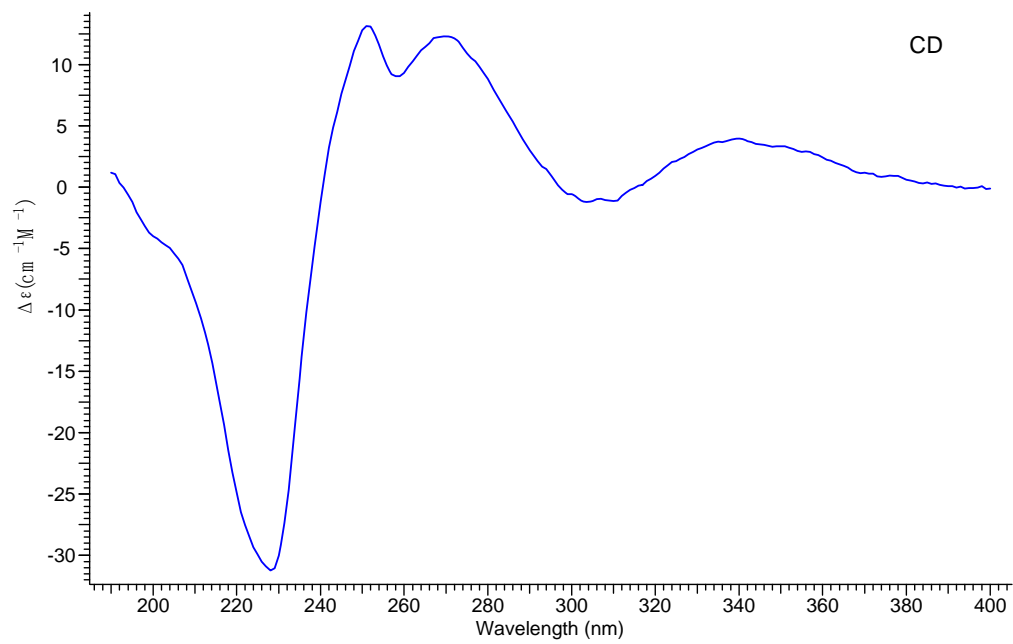

Supplement: c4ra11712c1.pdf [file c4ra11712c1.pdf]
